# Supplementary material
Source: Elsevier journal article supplement (https://www.sciencedirect.com/science/article/pii/S0014256520300916)
Supplement: mmc1 [file S0014256520300916:mmc1.pdf]

## SÍNDROME DE QUEMARSE POR EL TRABAJO (BURNOUT) EN LOS MÉDICOS DE ESPAÑA

### WORK-RELATED BURNOUT SYNDROME IN PHYSICIANS IN SPAIN

#### **Autores**

\*Bouza E. 1; \*

\*Gil-Monte P.R. 2

Palomo E. 17

Working Group to Deliberate on Burnout among Physicians in Spain

Composition of the Working Group to Deliberate on Burnout among Physicians in Spain

#### Authors

\*Bouza E. 1; \*

\*Gil-Monte P.R. 2

Cortell-Alcocer M.3

Del Rosario G.4

González J.5

Gracia D.6

Martínez Moreno A.7

Melero Moreno C.8

Molero García JM.9

Montilla P.10

Peñacoba E.11

Rodríguez.Créixems M.12

Rodríguez de la Pinta ML.13

Romero Agüit S.14

Sartorius N.15

Soriano JB.16

Palomo E. 17

\*Both first authors

1.- Clinical Microbiology and Infectious Diseases Department, Hospital General Universitario Gregorio Marañón, School of Medicine, Universidad Complutense de Madrid (UCM), Instituto de Investigación Sanitaria Gregorio Marañón, and CIBER de Enfermedades Respiratorias (CIBERES CB06/06/0058), Madrid.

2.Unidad de Investigación Psicosocial de la Conducta Organizacional (UNIPSICO), Universitat de València.

3.- Psychologist Specialist in Clinical Psychology. Ibermutuamur collaborator. Valencia.

4.-Journalist. EFE Health Agency. Madrid

5.-Doctor in Pharmacy. Universidad Complutense de Madrid

6.- Emeritus Professor. Universidad Complutense. Madrid President, Ciencias de la Salud Foundation. Madrid

- 7.-Specialist in Clinical Psychology. Organisation and Human Resources Consultant. Associate Professor at the Universitat de València. Director of Aduma-Psicología. Valencia
- 8.- Pneumology Department and Research Institute (i+12) Hospital Universitario 12 de octubre. Madrid.
- 9.- Family Physician. Madrid Health Services. Secretary of SIME-CSIT Professional Union. Madrid
- 10.- Senior Medical Specialist in Clinical Microbiology and Infectious Diseases. Clinical Microbiology Department of the Hospital General Universitario "Gregorio Marañón". Madrid
- 11.- Lawyer – Simmons (Simmons LLP. Branch in Spain. Madrid
- 12.- Specialist in Clinical Microbiology. Department Head (Retired). Clinical Microbiology and Infectious Diseases Department. Hospital General Universitario Gregorio Marañón. Universidad Complutense. Madrid
- 13.- Occupational Risks Prevention Department Head Hospital Universitario Puerta de Hierro Majadahonda. Madrid
- 14.-President of the General Council of Official Medical Associations of Spain. Madrid
- 15.- Psychiatrist of the Comprehensive Care Plan for the Sick Healthcare Professional (PAIPSE). General Directorate of Human Resources. Ministry of Health. Madrid
- 16.- Epidemiologist. Hospital Universitario de la Princesa. Universidad Autónoma de Madrid. Centro de Investigación en Red de Enfermedades Respiratorias (CIBERES), Instituto de Salud Carlos III (ISCIII), Madrid.
- 17.- Pharmacist. Director of Ciencias de la Salud Foundation. Madrid Spain.

#### **Autor Correspondencia**

Emilio Bouza MD, PhD.  
Instituto de Investigación Sanitaria Gregorio Marañón.  
C/ Dr. Esquerdo, 46  
28007 Madrid, Spain  
Telephone: +34- 91- 586 84 53/Fax: +34- 91- 504 49 06  
E-mail: [emilio.bouza@gmail.com](mailto:emilio.bouza@gmail.com)

#### **Alternativo autor de correspondencia**

Esteban Palomo, PhD.  
Director. Ciencias de la Salud Foundation  
C/ Severo Ochoa 2  
28760 – Tres Cantos Madrid  
Telephone: +34 91 3530150

## **RESUMEN**

Este artículo reúne las opiniones de un grupo de trabajo para deliberar sobre el síndrome de “Burnout” entre los médicos en España. El documento es el resultado de las respuestas que los miembros del grupo han preparado a diferentes preguntas sobre el tema con conclusiones derivadas de la discusión entre todos los participantes. El “Burnout” es una entidad con una alta incidencia en los médicos, con graves repercusiones laborales, personales y económicas, cuyo reconocimiento como enfermedad está cambiando en los últimos años. Se ven especialmente afectadas especialidades como la Atención Primaria, la Oncología, la Medicina Intensiva y los Cuidados Paliativos. El factor común es un aumento de la demanda cualitativa o cuantitativa sobre el profesional. Aunque puede tener un sustrato de características personales se asocia más comúnmente a factores extrínsecos propios de la organización del trabajo y la gestión de los riesgos laborales. Implica graves costes indirectos para el sistema sanitario, como el absentismo laboral, altos costes económicos y provoca la pérdida de salud y bienestar de las personas que lo padecen.

## **Palabras clave**

Quemarse por el trabajo, desgaste profesional, salud de los médicos, riesgos laborales, profesionales de la salud

## **ABSTRACT**

This article brings together the views of a working group to deliberate on Burnout among Physicians in Spain. The document is the result of the answers that different members of the group have prepared to different questions on the subject with conclusions derived from the discussion among all the participants. Burnout is an entity with a high incidence in physicians, with serious work, personal and economic repercussions, whose recognition as a disease is changing in recent years. Particularly affected are some specialties, such as Primary Care, Oncology, Intensive Care Medicine, and Palliative Care. The common factor being an increased qualitative or quantitative demand on the professional. Although it may have a substratum of personal characteristics, it is more commonly associated with extrinsic factors specific to the organisation of work and the management of occupational risks. It involves serious indirect costs for the health system including absenteeism, high financial costs and leads to loss of health and well-being in people who suffer it.

## **Key words**

Burnout, Burnout in Spain, Physicians health, labor risk, health-care professionals

## **INTRODUCCION**

El Síndrome de Quemarse por el Trabajo (SQT) o "Burnout" es un problema de salud que puede afectar a profesionales de todo tipo, pero muy especialmente a aquellos cuya actividad guarda relación con el cuidado de seres humanos. Los profesionales de la salud están particularmente expuestos a este cuadro y los médicos son el prototipo de trabajador expuesto al mismo. Se trata de un problema de salud tremendamente destructivo que afecta a la vida laboral y personal, que lesiona la calidad del trabajo prestado y que deteriora los planos cognitivo y emocional del individuo, su vida familiar y hasta su salud física. Pese a los muchos años transcurridos desde que se dio nombre a este síndrome, la información sobre el mismo es muy fragmentaria. Las definiciones no son precisas, el enfoque del proceso depende mucho de la perspectiva profesional de quién lo hace y no disponemos, por tanto, de una fotografía afinada y nítida del mismo. Por este motivo, la Fundación de Ciencias de la Salud, que tiene entre sus objetivos la prevención de la Salud, ha reunido en torno a una mesa a profesionales conocedores de este cuadro desde muy distintas perspectivas: la Psiquiatría, la Psicología, la Medicina, los Sindicatos profesionales, la Epidemiología, el Derecho y la Propia Organización Médica Colegial. Se trataba de responder, desde cualquiera de los planos anteriores, a la situación del SQT entre los médicos españoles, poniendo encima de la mesa, no sólo los limitados datos de que disponemos, sino también la opinión sobre los mismos de los participantes.

El formato que se eligió fue el de preparar una serie de preguntas que sobre esta situación se formulaban los miembros del Patronato de la Fundación a la que los participantes respondían con la mejor información de la que disponían. Se trataba de exponer no sólo que sabemos, pero fundamentalmente lo que no sabemos sobre SQT en médicos españoles.

La reunión inicial se celebró en la Real Academia Nacional de Medicina el 29 de mayo de 2019 y el presente escrito pretende recoger lo esencial de lo allí discutido durante dicha jornada. Todos los participantes lo hacían a título personal y sus opiniones no necesariamente representan las de las asociaciones y agrupaciones a las que pertenecen o en las que se integran. Este documento no pretende emitir guías ni recomendaciones sobre este tema sino proporcionar una visión de los distintos aspectos del mismo, resumir la situación española y expresar opinión.

## **MATERIAL Y MÉTODOS**

Las preguntas sobre SQT fueron elegidas por los miembros del patronato de la Fundación de Ciencias de la Salud con la contribución de un experto sobre el tema en España (PGM). Posteriormente fueron aceptadas por los participantes. Cada una de ellas tuvo un ponente que exponía su visión sobre lo preguntado y tras una discusión se consensuaba una conclusión sobre cada pregunta.

Los textos de las distintas intervenciones fueron revisados y aprobados por todos los participantes tras el necesario proceso editorial previo a la publicación.

**PREGUNTA 1. ¿Cuál es la mejor definición de síndrome de Quemarse por el Trabajo (SQT)/ Síndrome de Desgaste profesional/ Burnout? ¿La definición y concepto de SQT, requiere algún matiz en su aplicación a la profesión médica?**

**Exposición:**

El concepto de “síndrome de quemarse por el trabajo” (SQT) o *burnout* se presenta como un concepto complejo de delimitar. Existe acuerdo en que se trata de:

- 1.- una respuesta al estrés laboral crónico,
- 2.- una experiencia subjetiva de carácter negativo que deteriora el plano cognitivo, emocional y actitudinal del individuo,
- 3.- que conlleva el desarrollo de conductas negativas hacia el trabajo, hacia las personas con las que se relaciona el individuo en su medio laboral y hacia el propio papel profesional, y
- 4.- que se acompaña de alteraciones psicológicas y fisiológicas. Es un proceso que se desarrolla de manera progresiva y que se hace crónico<sup>1</sup>. También existe acuerdo en que no es un problema psiquiátrico, sino una alteración del estado del ánimo, una disforia derivada de la actividad laboral<sup>2-4</sup> que en ocasiones se acompaña de sentimientos de culpa<sup>5</sup>.

Sin embargo, las definiciones elaboradas para delimitarlo y diferenciarlo de otros problemas psicológicos y psiquiátricos son numerosas y dispares. La primera definición en una publicación de carácter científico fue elaborada por Freudenberger en 1974<sup>6</sup> quien lo define como “fallar, agotarse, o llegar a desgastarse debido a un exceso de fuerza, demandas excesivas de energía o de recursos”. Esta definición se caracteriza por destacar como sintomatología más relevante el deterioro emocional y físico de la persona, pero no contempla otros planos de la psique que también se reconocen como síntomas del SQT en la actualidad, a saber, el plano cognitivo y el actitudinal.

Al igual que Freudenberger, otros autores han puesto énfasis en la definición del SQT el deterioro emocional y físico de la persona que lo desarrolla, restando importancia a otros síntomas relevantes que permiten diferenciarlo de otras alteraciones del estado de ánimo. Entre esas definiciones están la de Edelwich y Brodsky en 1980<sup>7</sup> quienes lo definen como “una pérdida progresiva del idealismo, de la energía y del deseo de alcanzar objetivos que aparece en los profesionales de ayuda como resultado de sus condiciones de trabajo”, o la de Pines y Kafry en 1982<sup>8</sup> que lo definen como “un estado de agotamiento mental, emocional y físico causado por el estrés emocional crónico resultado de la implicación excesiva con la gente durante largos periodos de tiempo”. Posteriormente, algunos autores han concluido que el síntoma más relevante del SQT es el deterioro emocional<sup>9</sup>. Esta perspectiva sobre el concepto del SQT está sustentada empíricamente por el tipo de cuestionario o escala utilizado para la evaluación, como la subescala de Agotamiento emocional del *Maslach Burnout Inventory* y el cuestionario *Burnout Measure*<sup>10</sup>. No obstante, la definición más extendida es la que se deriva de la estructura factorial del cuestionario *Maslach Burnout Inventory* (MBI), desarrollado por Maslach y Jackson en los años 80 del siglo pasado<sup>10</sup>. Como resultado de esa estructura, el SQT se define como “un síndrome de agotamiento

emocional, despersonalización y falta de realización personal en el trabajo que puede desarrollarse en aquellas personas cuyo objeto de trabajo son personas en cualquier tipo de actividad”.

Aunque posteriormente, tras el desarrollo de una nueva versión del MBI<sup>11</sup>, el SQT pasa a ser definido como “un estado de agotamiento que se acompaña de cinismo sobre el valor de la profesión y dudas sobre la capacidad para desempeñar la actividad laboral”. El problema de esta definición es que ha sido elaborada desde el constructo, esto es, el concepto es resultado de una medida determinada y no de la conceptualización teórica y delimitación del fenómeno.

Al adoptar esta definición se peca de reduccionismo, pues no se recoge el fenómeno en toda su amplitud. Esta forma de conceptualizar ha sido criticada porque lleva a una tautología, pues el SQT es lo que evalúa el MBI y el MBI es el instrumento para evaluar el SQT.

### **Conclusión:**

**El SQT es “una respuesta psicológica al estrés laboral crónico de carácter interpersonal y emocional que aparece en los profesionales de las organizaciones de servicios que trabajan en contacto con los clientes o usuarios de la organización. Se caracteriza por un deterioro cognitivo (pérdida de la ilusión por el trabajo o baja realización personal en el mismo), un deterioro afectivo (agotamiento emocional y físico), aparición de actitudes y conductas negativas hacia los clientes y hacia la organización, y, en algunos casos, estos síntomas se acompañan de sentimientos de culpa.**

### **PREGUNTA 2.- ¿Cuál es la dimensión del SQT en la profesión médica? ¿Tenemos datos mundiales, europeos y españoles?**

#### **Exposición:**

Conocer la magnitud del SQT es imprescindible para poder tomar medidas que mitiguen el desarrollo del síndrome. Sin embargo, los estudios realizados han sido muy diferentes en cuanto a la metodología utilizada y no permiten dar cifras comparables. Cuando se introducen en PubMed las palabras “Prevalence” “Burnout” y “Physicians” obtenemos 890 citaciones, pero en algunas de ellas, figuran también enfermeras y otro personal sanitario. Analizaremos los datos de los artículos con mayor número de individuos evaluados.

En los estudios de los Estados Unidos de América, destaca el publicado por Shanafelt y colaboradores<sup>12</sup> realizado en junio de 2008, entre 7.905 cirujanos en el que encontraron una prevalencia de SQT del 39,6%. Los factores más asociados al cuadro incluían la edad, el tener hijos, el tipo de especialidad quirúrgica, el número de noches de guardia por semana, las horas trabajadas y la facturación. Siguiendo con datos sobre cirujanos, Qureshi HA<sup>13</sup>, realizó un estudio entre septiembre de 2010 y agosto de 2011 entre 1.691 cirujanos plásticos activos en EE.UU. encontrando una prevalencia de SQT del 29,7%.

En otro estudio de los EE. UU, realizado sobre médicos en general y comparando los resultados con población control<sup>14</sup>, la prevalencia de SQT fue del 54% en los 6.880 médicos participantes. Tras la comparación con el grupo control, los

médicos tenían un riesgo mayor de SQT y menores probabilidades de estar satisfechos en el binomio trabajo-vida. Además, la situación de los médicos era peor que la encontrada unos años antes, en 2011. Otro subgrupo de interés es el de los médicos norteamericanos que se dedican a Cuidados Paliativos en los que la prevalencia de SQT fue del 61,9%, con agotamiento emocional en el 60% y despersonalización en el 24%<sup>15</sup>. China, como representante del continente asiático, aporta el trabajo de Li y colaboradores<sup>16</sup> que realiza un estudio en Pekín, utilizando el MBI-SS, en 211 hospitales con la participación de 2.873 anestesiistas, entre junio y agosto de 2015. Encuentra una prevalencia del 69% de SQT entre los anestesiistas chinos con un agotamiento emocional del 57%, una despersonalización del 49% y descenso de la realización personal del 57%. Realizan una regresión logística multivariable y encuentran como variables independientes, asociadas al agotamiento, la edad, la categoría del hospital, las horas de trabajo por semana, el número de casos vistos al día y la calidad del sueño. En Europa, Banerjee y col.<sup>17</sup> realizaron un amplio estudio en el que analizan 595 jóvenes (< de 40 años) oncólogos europeos, utilizando la base de datos de la Sociedad Europea de Oncología Médica. Los médicos encuestados pertenecientes a 41 países europeos fueron distribuidos en 6 zonas de Europa: a.- Norte de Europa e Islas Británicas, b.- Europa del Este (Bielorrusia, Estonia, Letonia, Lituania, Georgia, Moldavia, Ucrania y federación Rusa, c.- Europa del Sudeste (Albania, Bosnia, Bulgaria, Croacia, Chipre, Grecia, Israel, Macedonia, Montenegro, Serbia y Turquía), d.- Europa Central (Austria, Republica Checa, Alemania, Hungría, Polonia, Rumanía, Eslovaquia, Eslovenia y Suiza), e.- Europa del Sudoeste (Italia, Portugal y España) y f.- Europa Occidental (Francia, Bélgica y Luxemburgo). Según este estudio, el 71% de todos los médicos analizados mostraron evidencia de agotamiento, encontrando agotamiento emocional en el 45%, una despersonalización en el 50% y un descenso de la realización personal del 35% (Figura 1).

Figura 1.- Distribución regional de la prevalencia de SQT entre oncólogos jóvenes europeos

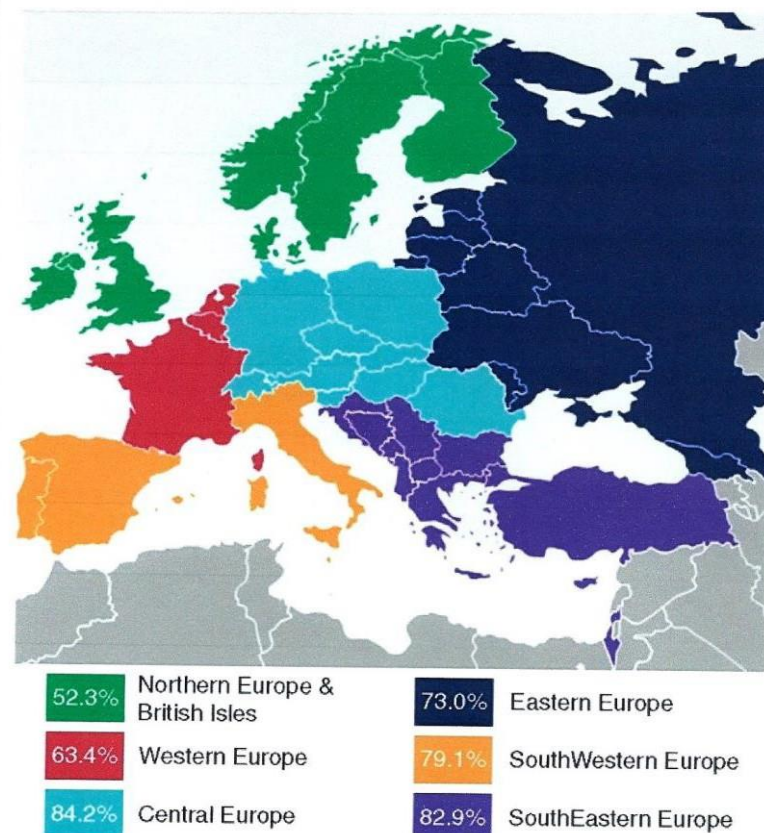

Europa Central mostró la mayor prevalencia con el 84% y la menor Europa del Norte e Islas Británicas con el 52% y no se encontraron diferencias significativas entre mujeres (69%) y hombres (75%) ( $p=0,12$ ).

En el mundo hispánico, Mingote Adan y colaboradores<sup>17</sup>bis revisaron el tema ya en 2004 y Grau-Martin y col.<sup>18</sup> estudian, vía online, a 11.530 trabajadores sanitarios de habla hispana de diferentes países que incluyen Argentina (7.503), México (1.125), Ecuador (593), Perú (494), Colombia (337), Uruguay (305), Guatemala (199), España (175), El Salvador (121) y otros (678). El estudio se llevó a cabo entre diciembre de 2006 y septiembre de 2007 (9 meses), utilizando el MBI más un cuestionario de elaboración propia. Los médicos eran 9.848 (85,4%), de diversas especialidades, el 49% eran mujeres, la edad media fue de 47 años y la mediana de experiencia profesional cercana a los 16 años. En este contexto, la prevalencia global de agotamiento encontrado fue del 11,4% y particularmente entre los médicos, del 12,1%. En el caso de España la prevalencia encontrada en este artículo fue del 14,9%, la más alta junto con Argentina (14,4%). En cuanto a las diferentes especialidades, los médicos de los servicios de emergencias (17%) junto a los internistas (15,5%) fueron los que presentaron prevalencias más altas y los anestesistas (5%) y dermatólogos (5,3%) las más bajas. Este mismo autor<sup>19</sup>, realizó un estudio en la provincia de Gerona (España) en el que participaron 5 hospitales e incluyeron a 1.095 trabajadores sanitarios, de los que sólo el 24,5% eran médicos. Los médicos presentaron niveles altos de agotamiento emocional (46,5%), valores medios de despersonalización (45,9%) y valores bajos de realización personal (37%). Más recientemente, Riquelme y colaboradores en la provincia de Madrid<sup>20</sup>, publican la prevalencia de SQT entre



los médicos que tratan pacientes con dolor crónico en una Clínica del dolor. Para la evaluación se utiliza el MBI-HSS. De los 301 médicos participantes, 22 (7,3%) cumplieron criterios de SQT. Mencionaremos, por último, un reciente metaanálisis realizado por investigadores de la Universidad de Harvard (Boston, Massachusetts)<sup>21</sup> que analiza 182 estudios aparecidos en la literatura entre 1991 y 2018 y que incluyen 109.628 individuos de 45 países. El 85,7% de los autores utilizan alguna de las versiones del MBI para la evaluación, pero existe un enorme desacuerdo entre los diferentes autores con los criterios generales de las subescalas para definir agotamiento o no agotamiento. Sólo el 67% de los artículos analizados informan sobre agotamiento global, el 72% sobre agotamiento emocional, el 68,1% sobre despersonalización y 63,2% sobre baja realización personal. Los autores del metaanálisis informan que se utilizaron, al menos, 142 definiciones únicas para cumplir los criterios generales de agotamiento y de las subescalas del MBI, la mayoría inconsistentes. Por toda esta heterogeneidad, solo realizaron una síntesis cualitativa del subconjunto de estudios grandes, con al menos 300 participantes, que incluyeron 45 estudios y 65.327 individuos de 20 países. A pesar de todo, los resultados mostraron prevalencias muy variables que van desde 0 a 80,5%. Lo mismo ocurre con los datos de agotamiento emocional (0-86,2%) de despersonalización (0-89,9%) y de realización personal (0-87,1%).

#### **Conclusión:**

**Los datos de SQT en el mundo, referentes a personal sanitario, están obtenidos con estudios muy variables en metodología y momento y se carece de información precisa en casi todas las naciones. Sin embargo, puede concluirse que donde quiera que se ha buscado y con las limitaciones mencionadas, las cifras de SQT resultan muy elevadas en los médicos de todos los lugares y especialidades.**

#### **PREGUNTA 3.- ¿Existe la simulación en este cuadro? ¿Hay un SQT ficticio y fraudulento?**

#### **Exposición:**

El Síndrome de SQT tiene una serie de características que dificultan su simulación:

- No es un proceso agudo, es una patología de instauración prolongada en el tiempo. Es un fenómeno progresivo en el que hay una adaptación psicológica paulatina ante requerimientos emocionales mantenidos en el tiempo.
- Es un proceso dinámico que se inicia, en la mayoría de los casos, por una situación de estrés con desajuste entre las demandas y los recursos del trabajador, seguida de una fase de agotamiento, llegando finalmente a la fase de despersonalización.
- Tiene una sintomatología muy variada que nos puede orientar al diagnóstico correcto de este síndrome:

Hay un predominio de síntomas afectivos relacionados con la depresión, la indefensión, el sentimiento de fracaso y la pérdida de autoestima.

Entre los síntomas cognitivos destacan las dificultades para concentrarse o para tomar decisiones.

En cuanto a los síntomas conductuales, el sujeto pierde la capacidad para planificar, proyectar y plantearse metas.

Los aspectos sociales son importantes y entre ellos destaca el aislamiento. El paciente con un cuadro de desgaste profesional se presenta como alguien que tiende a aislarse y a encerrarse en su sentimiento de fracaso.

Las manifestaciones físicas más frecuentes son las cefaleas, los dolores musculares, la pérdida de apetito, las disfunciones sexuales y los problemas de sueño. También se asocia a un aumento del consumo de estimulantes y otras sustancias.

Revisando la sintomatología, observamos que los síntomas son progresivos y mantenidos en el tiempo, además es difícil conseguir una mejoría en el estado de salud del trabajador sin una intervención sobre los factores psicosociales que afectan su actividad laboral.

– Las consecuencias del síndrome son amplias e importantes y afectan, como ya hemos visto, a la salud mental y a la salud física, pero también a la calidad de vida y a la eficacia profesional del médico (satisfacción laboral, y calidad asistencial)<sup>22</sup>. En el hipotético caso de que existiera un Síndrome de Burnout ficticio los objetivos que perseguiría estarían encuadrados en los siguientes:

– No asistir al puesto de trabajo. La Incapacidad Transitoria Laboral, puede responder a la decisión tomada por el trabajador con un fin fraudulento y abusivo, ya que sin estar enfermo emplea una fórmula legalmente admitida para faltar al trabajo. Los factores psicosociales son, en muchos casos, los precedentes de conductas de absentismo y existen evidencias científicas que reflejan el efecto de los mismos sobre la frecuencia, duración e incidencia de la Incapacidad Transitoria. En general los cuadros de Desgaste profesional tienen una repercusión en el estado de salud del individuo que conlleva un incremento del absentismo laboral, relacionado con trastornos musculoesqueléticos, depresivos y alteraciones psicosomáticas.

Hay estudios realizados en profesionales sanitarios que demuestran que la ambigüedad de rol predecía la frecuencia de las ausencias cortas en los doce meses siguientes, y la percepción de falta de apoyo por los supervisores predecía las ausencias de más de cuatro días, mientras que el cansancio emocional predecía las ausencias de más de siete días en los doce meses siguientes<sup>22</sup>

– Mejorar las condiciones de trabajo (adaptación/cambio de puesto de trabajo).

Los Servicios de Prevención de Riesgos Laborales, tienen entre sus deberes la atención del trabajador especialmente sensible. La ley de Prevención de Riesgos Laborales en su Artículo 25 habla de la Protección de los trabajadores especialmente sensibles a determinados riesgos y dice lo siguiente: “El empresario garantizará la protección de los trabajadores que, por sus propias características personales o estado biológico conocido, sean especialmente sensibles a los riesgos derivados del trabajo<sup>23</sup>. Esto será tenido en cuenta en las evaluaciones de riesgos y, en función de éstas, adoptará las medidas preventivas y de protección necesarias. Los trabajadores no serán empleados en aquellos puestos de trabajo en los que, a causa de sus características personales, estado

biológico o por su discapacidad física, psíquica o sensorial, debidamente reconocida, puedan ellos, los demás trabajadores u otras personas relacionadas con la empresa ponerse en situación de peligro”.

El trabajador podría buscar una mejora en su puesto de trabajo, solicitando una adaptación o cambio del mismo por problemas de salud relacionados con el desempeño de su actividad laboral.

### **Conclusión:**

**No hay datos en la bibliografía que nos permitan afirmar que existe la simulación como un hecho significativo en el Síndrome de Quemarse por el Trabajo o “Burnout”.**

### **PREGUNTA 4.- ¿Cuáles son los factores predisponentes extrínsecos más claros? ¿hay factores intrínsecos?**

#### **Exposición:**

Consideramos que el SQT constituye una respuesta al estrés crónico como resultado del fracaso de las estrategias de afrontamiento que el individuo utiliza para gestionar el estrés laboral<sup>24</sup>. En este sentido podemos identificar factores predisponentes extrínsecos, que se encuentran en los contextos de las organizaciones laborales, y otros factores intrínsecos que se relacionan con las capacidades y características individuales. El SQT requiere la confluencia específica de factores de los dos ámbitos combinados.

Entre los factores predisponentes externos podemos identificar los siguientes:

- Relación frecuente con estimulación de tipo aversivo. Es el caso de muchos profesionales sanitarios o de las personas que cuidan a otras en situación de dependencia.
- Relaciones de ayuda con personas (clientes) en contextos que requieren grados elevados de implicación. Ello supone la necesidad de disponer de capacidades que permitan gestionar de manera adecuada la implicación de forma que no sea excesiva, lo que aumentaría la identificación, o demasiado desapegada (evitativa) lo que comportaría despersonalización y, en algunas personas, la aparición de procesos de auto culpabilización.
- Problemas de diseño de la estructura de papeles de la que forma parte la persona profesional, de manera que se producen disfunciones del papel (“rol”), sobre todo relacionadas con el conflicto, la ambigüedad y la sobrecarga del mismo.
- Deterioro del clima de trabajo de manera que el apoyo social necesario no se encuentra disponible o no es adecuado para la situación.
- En general, aquellas situaciones sociolaborales que comporten sobrecarga cognitiva por diferentes causas que pueden dificultar la obtención de suficiente sensación de control de forma sostenida.
- Estructuras organizativas excesivamente jerarquizadas y rígidas que dificultan la participación y el reconocimiento adecuado de los esfuerzos. Especialmente importante son los patrones de motivación negativa en los que las personas

realizan la mayoría de sus esfuerzos para evitar consecuencias indeseables más que para obtener logros reconocibles.

Cambios más o menos bruscos en las organizaciones que cuestionan las formas habituales de trabajo y que pueden facilitar la emergencia de dudas acerca de la adecuación y suficiencia de las competencias personales y profesionales disponibles.

Estilos de dirección erráticos y excesivamente centrados en la tarea más que en las personas y en su desarrollo profesional.

Asociación entre la percepción del uso de los registros de salud electrónicos y el agotamiento profesional entre los médicos de EE.UU.<sup>24bis</sup>

Entre los factores intrínsecos se han identificado en la literatura los siguientes:

Falta de confianza en las propias competencias<sup>25</sup> lo que puede producirse como consecuencia de diferentes fracasos en el cumplimiento de las expectativas de eficacia. En este sentido esta situación puede verse amplificada por la existencia de demandas elevadas y recursos escasos de manera reiterada, lo que comportaría una menor autoeficacia como inicio del proceso del SQT.

Baja autoestima

Características de personalidad tipo A

Dificultades de autogestión emocional que, en su forma extrema, puede adoptar las características de la incompetencia emocional.

Aunque se ha intentado en múltiples estudios establecer relaciones entre diferentes factores y características de personalidad y el SQT, no consideramos que se haya podido establecer una relación clara. Sin embargo, las condiciones laborales negativas (factores extrínsecos) sí que reiteran resultados significativos con relación al SQT.

### **Conclusión:**

**La influencia de las características individuales (factores intrínsecos) es relevante y se pueden identificar algunos factores predisponentes, pero son los factores extrínsecos, las condiciones laborales, las que resultan más determinantes para padecer SQT.**

### **PREGUNTA 5.- ¿Cuáles son las manifestaciones clínicas iniciales más frecuentes? ¿Quién suele alertar primero sobre este diagnóstico?**

#### **Exposición:**

“Burnout” o SQT es un constructo diagnóstico caracterizado por la afección primaria de tres dimensiones de reacciones al estrés relacionado con el trabajo, principalmente descrito en trabajos que implican “cuidar de otros”, esto es: sanitarios, educadores, y otras personas que intervienen en diversas relaciones de ayuda (miembros de ONGs, trabajadores sociales, etc.)<sup>26</sup>

Una de sus principales características es la citada relación con el trabajo que se desarrolla. Aunque no puede definirse una causa, ni siquiera varias, los factores de riesgo se relacionan con factores laborales tales como la sobrecarga de trabajo exigente, tanto en lo técnico como en lo emocional, la escasa capacidad de control sobre él, la ausencia de apoyo y reconocimiento institucional, etc. Sus principales

repercusiones también son primariamente laborales, pero pronto se extienden a la vida personal, invadiendo diversos ámbitos del funcionamiento del afectado<sup>27, 28</sup>.

Las descripciones del síndrome incluyen la aparición de al menos tres fenómenos: 1) agotamiento emocional, con un amplio cortejo de síntomas relacionados con él; 2) la despersonalización, caracterizada por el “distanciamiento” y una sensación de extrañeza frente a uno mismo y frente al ambiente en que se mueve; y 3) sensación de incapacidad e inutilidad del propio esfuerzo.

En estudios metodológicamente muy diferentes se habla de diferentes subtipos desde el “frenético” al “desgastado” o desde el “agotado” al “indiferente” y al “quemado”, con diferentes prevalencias de síntomas depresivos o ansiosos, y diferentes pronósticos<sup>29</sup>. Los propios autores que los describen se plantean la posibilidad de que se trate de diferentes fases evolutivas o la combinación de estas con diferentes tipos de personalidad.

En cualquier caso, parecen ser los síntomas relacionados con el agotamiento emocional los primeros en aparecer. Entre ellos destacan alteraciones en el sueño, irritabilidad, dificultades para mantener la concentración, sensación de falta de energía, sensación de inutilidad del propio esfuerzo y de ineficacia, así como diversos síntomas somáticos<sup>30</sup>.

Todos los síntomas iniciales de este síndrome son demasiado inespecíficos como para que tengan una alta validez diagnóstica en el ámbito clínico, sin embargo, deben ser entendidos como síntomas de alerta. Una vez establecida la sospecha clínica existen instrumentos basados en “clústeres” de síntomas que permiten diferenciar este síndrome de otros con los que comparte síntomas, especialmente con el trastorno depresivo mayor, el trastorno de ansiedad generalizado, el trastorno por estrés postraumático secundario y la “compassion fatigue”<sup>31</sup>.

Como en cualquiera otra área de la medicina el valor de un síntoma, un síndrome, un test bioquímico o de imagen, depende críticamente de la prevalencia. Y esta prevalencia es particularmente alta en las profesiones sanitarias. En la base de este problema están las enormes exigencias técnico – científicas de la medicina (de la epistemología médica), pero sobre todo las consecuencias emocionales de un planteamiento ético que es su auténtica base, este es el compromiso por el paciente, especialmente en circunstancias en las que las necesidades que este plantea desbordan la capacidad del médico por satisfacerlas<sup>32</sup>.

Llamativamente muchos médicos finalmente diagnosticados de SQT, presentan síntomas sugestivos pronto en sus carreras profesionales, pero el diagnóstico, cuando se hace, suele ser tardío. Tras este fenómeno, pueden estar desde estrategias de evitación, temor al estigma, temores respecto de la pérdida del trabajo o de la consideración por parte de sus colegas u otros, diferentes en diferentes sistemas sanitarios. Una vez reconocido y aceptado el SQT como entidad nosológica definida, y tras una adecuada sensibilización tanto de los sanitarios potencialmente afectados como de los implicados en su diagnóstico y tratamiento (médicos de familia y otros generalistas y profesionales de los Servicios de Salud Mental y Salud Laboral), es de esperar que sea tenido como posibilidad diagnóstica en todos estos ámbitos. Esto posibilitaría la intervención más precoz y minimizaría el daño tanto para el afectado como para las organizaciones sanitarias y los pacientes. Por otra parte, el ser reconocido como

enfermedad, posiblemente reduzca el estigma asociado a este complejo síndrome y facilite que los profesionales afectados busquen ayuda antes.

### **Conclusión:**

**Los profesionales sanitarios, sometidos a un estrés laboral muy importante por las propias exigencias emocionales, éticas y técnicas que impone la relación con sus pacientes, son un grupo profesional en el que el nivel de sospecha sobre la aparición de SQT debe ser muy alto.**

**Los rasgos clínicos iniciales de este síndrome son muy inespecíficos, pero la**

**aparición de síntomas relacionados con el agotamiento emocional debe mover a iniciar el trabajo diagnóstico a fin de diferenciar el síndrome de otros, con los que suele ser confundido. No está claro dónde y por quién suele alertarse inicialmente de la presencia de SQT.**

### **PREGUNTA 6.- ¿Cómo se diagnostica el SQT?**

#### **Exposición:**

Pocos años después de que Herbert Freudenberger <sup>6</sup> describiese el *Síndrome de Burnout*, en 1974, Maslach y Jackson (1981) publican la primera versión del MBI (*Maslach Burnout Inventory*)<sup>10</sup> y este cuestionario se ha convertido en la principal referencia para la investigación y el diagnóstico del SQT. Aunque originalmente se planteó para evaluar *burnout* en educadores y profesionales de servicios a personas, posteriormente se han desarrollado otras versiones de aplicación más general. Este hecho ha supuesto una indudable ventaja que ha permitido una comprensión más homogénea del síndrome en distintos contextos culturales y profesionales que se refleja en las tres dimensiones planteadas en el MBI: a) desgaste emocional, b) despersonalización y c) eficacia profesional.

Posteriormente han aparecido otras propuestas para el diagnóstico y evaluación del *burnout* como por ejemplo el *Burnout Measure* (BM, Pines y Aronson, 1988), el *Oldenburg Burnout Inventory* (OLBI, Demerouti, et. al, 2001) o el *Copenhagen Burnout Inventory* (CBI, Krhstensen et al. 2005).

Por su relevancia en el abordaje del diagnóstico clínico destaca el *Cuestionario para la Evaluación del Síndrome de Quemarse por el Trabajo* (CESQT, Gil-Monte, 2011) que considera cuatro dimensiones: 1) *Ilusión por el trabajo* (deseo de obtener metas laborales significativas) 2) *Desgaste psíquico* (relacionado con el agotamiento emocional que supone tratar con personas) 3) *Indolencia* (que se traduce en despersonalización y en ocasiones actitudes incluso cínicas) y 4) *Culpa*. La incorporación de la culpa<sup>33</sup> constituye un elemento especialmente significativo para comprender la dinámica del trastorno porque:

1) Su presencia puede suponer que la persona desarrolle el SQT o que, en su ausencia, no lo haga cuando se produce una acomodación a las condiciones laborales, aunque se acompañe de actitudes de indolencia en el trato con personas y de falta de ilusión por el trabajo y 2) porque la culpa supone una intensificación de los síntomas depresivos que se vinculan al SQT así como también a los de tipo ansioso.

Los cuestionarios, que resultan fundamentales para la investigación y para la detección de riesgos psicosociales en organizaciones laborales, son insuficientes para el diagnóstico clínico individual. Este requiere herramientas que permitan una mayor profundidad de análisis, tanto de las circunstancias y condiciones laborales como de las características y contingencias que afectan a los individuos concretos. Por ello la entrevista clínica resulta imprescindible. En estos momentos no se dispone de un protocolo estandarizado de entrevista clínica para el diagnóstico del SQT. Ello permitiría sistematizar el proceso de diagnóstico clínico individual y orientar la intervención psicoterapéutica, avanzando en la elaboración de protocolos de diagnóstico y tratamiento y permitiendo la medida de la eficacia y el avance de los procesos terapéuticos. Asimismo, el protocolo de entrevista habría de permitir identificar en qué momento del proceso de consolidación del SQT se encuentra la persona en lugar de centrarse únicamente en unos resultados que, en ocasiones, solo se manifiestan como referencia de un proceso en marcha y que puede tender a agravarse a medida que la persona sigue fracasando en sus intentos de afrontar las demandas del entorno con los recursos de que dispone. Es determinante identificar la fase de consolidación del SQT en que se encuentra la persona. Aunque existen diferentes propuestas de fases a través de las que se configura el SQT entendemos que, desde el punto de vista clínico, resulta especialmente útil la propuesta de Gil-Monte<sup>33</sup> que considera que el proceso se inicia con una primera etapa de deterioro cognitivo, una segunda de desgaste emocional, la tercera de actitudes negativas hacia las personas (indolencia, despersonalización y/o cinismo), para continuar en una cuarta fase caracterizada por la aparición de la culpa, precisamente porque las conductas implicadas en las fases anteriores contradicen el papel profesional prescrito y aceptado por la persona. Por otra parte, es fundamental proceder a un diagnóstico diferencial eficaz. En este sentido es imprescindible diferenciar SQT de otros trastornos relacionados con estrés y depresión:

Así, es necesario considerar el impacto de las condiciones laborales y las demandas que generan. El origen se encuentra en el trabajo, aunque los efectos puedan extenderse a otros ámbitos de la vida. En este sentido cabe considerar que, aunque el SQT constituye una respuesta al estrés laboral crónico, no es extraño encontrar situaciones en las que se manifiesta después de una situación específica de estrés agudo. Especialmente importante es diferenciar claramente el SQT de la depresión clínica, aunque éste curse con síntomas depresivos, ya que encontramos casos de personas diagnosticadas como depresivas que, cuando mejoran y se aproximan a su reincorporación al trabajo, vuelven a empeorar una y otra vez con los consiguientes sentimientos de culpa que suelen acompañar esta situación. Asimismo, podemos considerar como en el estrés la implicación en el trabajo, así como la activación emocional suelen ser máximas mientras que en el SQT lo que encontraremos será ausencia de implicación laboral y embotamiento emocional. Las activaciones por estrés (estrés funcional) no existen en el SQT y los síntomas depresivos se vinculan en gran medida a una devaluación de la propia imagen y autoestima profesional.

### **Conclusión:**

**El cuestionario MBI, complementado con el cuestionario CESQT que introduce fundamentalmente la evaluación de la culpa, y siempre en el contexto de una entrevista clínica, son las mejores herramientas de las que disponemos para hacer el diagnóstico de SQT. Es imprescindible diferenciar SQT de otros trastornos relacionados con estrés y depresión.**

### **PREGUNTA 7.- ¿Cuál es el proceso de desarrollo o las fases por las que progresa el SQT? ¿Puede hacerse una clasificación por gravedad del SQT-burnout?**

#### **Exposición:**

La descripción del proceso SQT se ha desarrollado desde dos perspectivas: (a) teórica, resultado de entrevistas a sujetos identificados como casos del SQT en algún grado y, (b) empírica, resultado de analizar la relación “causal” entre las dimensiones de un cuestionario, por lo general el Maslach Burnout Inventory. Dentro de la perspectiva teórica están, entre otros, el Modelo de Edelwich y Brodsky de 1980<sup>7</sup> que distingue cuatro fases: entusiasmo, estancamiento, frustración y apatía y el Modelo de Price y Murphy de 1984<sup>34</sup> que propone seis fases: desorientación, inestabilidad emocional, sentimientos de culpa, soledad y tristeza, solicitud de ayuda y restablecimiento del equilibrio inicial. Dentro de la perspectiva empírica se encuentran, por ejemplo, los modelos desarrollados por Maslach en 1982<sup>35</sup> o por Golembiewski y colaboradores en 1983<sup>36</sup> considerando las dimensiones del cuestionario “Maslach Burnout Inventory” y sus relaciones empíricas. Otra consideración para explicar el desarrollo y la clasificación según gravedad del SQT es la propuesta de perfiles o tipos. Esto es, no todos los individuos desarrollan todos los síntomas por igual, como proponen, por ejemplo, las aportaciones de Paine<sup>37</sup> que, a mediados de los años 80 del siglo pasado, distinguió entre “Burnout Stress Syndrome” y “Burnout Mental Disability”, siendo el primero una respuesta al estrés más moderada y menos traumática para la persona que el segundo. Vanheule et al., diferencian entre Tipo 1, caracterizado por una conducta más agresiva y Tipo 2, caracterizado por mayor implicación y desgaste<sup>38</sup>. Oosterholt et al. en 2014<sup>39</sup> identificaron dos tipos: burnout no clínico y burnout clínico (con más problemas de deterioro cognitivo). van Dam en 2016, distingue entre un tipo de SQT con un perfil más ansioso frente a otro tipo con un perfil más depresivo y fatigado<sup>40</sup>. Finalmente Tops et al.<sup>41</sup> distinguen entre sujetos con SQT y bajos niveles de prolactina (con alta implicación laboral) y sujetos con SQT y altos niveles de prolactina (con baja implicación). Gil-Monte<sup>42</sup> ha construido un modelo de proceso para explicar el desarrollo de este trastorno del estado de ánimo. La evidencia clínica basada en entrevistas indica que los sentimientos de culpa son un síntoma habitual de individuos que desarrollan el SQT en niveles más graves para la salud, y para entender su relación con otros problemas de salud más graves, como es



la depresión. En el modelo de Gil-Monte <sup>42</sup>, se identifican dos perfiles según la gravedad del desarrollo del SQT. En ambos perfiles el SQT se inicia como una respuesta crónica a fuentes de estrés laboral de carácter interpersonal. Los síntomas iniciales son: bajos niveles de ilusión por el trabajo junto con altos niveles de desgaste psíquico. Para manejar estos síntomas, los profesionales que desarrollan el SQT, desarrollan actitudes y conductas de distanciamiento e indiferencia hacia las personas a las que atienden y hacia el propio trabajo. Este síntoma, que es una estrategia de afrontamiento para el manejo de las fuentes de estrés laboral y de los otros síntomas, ha sido denominado Indolencia. Bajos niveles de ilusión por el trabajo, junto con altos niveles de desgaste psíquico e indolencia, caracterizan a los profesionales que desarrollan el Perfil 1 del SQT. Son profesionales que pueden mantenerse durante años en la organización sin desarrollar problemas de salud relevantes derivados del estrés laboral, aunque con sus actitudes y conductas de indolencia perjudican la calidad de servicio de la organización.

Por el contrario, el Perfil 2, caracteriza a los profesionales que experimentan remordimientos por no realizar de manera adecuada las prescripciones del "rol", por sentirse desgastados y no poder dar más de sí mismo, y por la utilización de indolencia como estrategia de afrontamiento. Estos individuos desarrollan niveles muy altos de sentimientos de culpa y manifestarán con mayor frecuencia e intensidad problemas psicosomáticos vinculados al estrés laboral, incluso pueden desarrollar patologías del tipo crisis de ansiedad y depresión como consecuencia del SQT. La aparición de los sentimientos de culpa muy intensos va a dar lugar a un círculo vicioso en el proceso de desarrollo del SQT que intensifica sus síntomas y lo hace más perverso. Esos sentimientos de culpa llevarán a los profesionales a una mayor implicación laboral para disminuir su remordimiento, pero, como las condiciones del entorno laboral no cambian, se incrementará el deterioro cognitivo y emocional, y aparecerán de nuevo actitudes y conductas de indolencia. Este proceso desarrollará de nuevo sentimientos de culpa, o intensificarán los existentes, originando un bucle que mantiene e incrementa la intensidad del SQT y hace crónico el Perfil 2.

### **Conclusión:**

**Distintos autores han establecido criterios de gravedad del SQT basados en la presencia o ausencia de distintas manifestaciones clínicas. Algunos signos o síntomas que para los diferentes autores apuntan a las formas más graves son: presencia de manifestaciones clínicas, trastornos mentales, conducta agresiva, perfil depresivo y niveles de prolactina elevados. Gil-Monte propone dos perfiles en el que los sujetos de Perfil 2, que serían los más graves se caracterizarían por un mayor sentimiento de culpa.**

## **PREGUNTA 8.- ¿Se contagia el SQT entre compañeros?**

### **Exposición:**

Para dar respuesta a la pregunta deberíamos dirigirnos dentro de las evocaciones implicadas en el SQT, a las profesiones con altas demandas y a las condiciones de trabajo que combinadas producen trastornos psicológicos y físicos que agotan los recursos emocionales del sujeto, y pueden iniciar el SQT<sup>43, 44</sup>. El agotamiento, se ha definido como un tipo específico de estrés laboral entre estos profesionales, como resultado de las relaciones exigentes y emocionalmente cargadas entre el profesional y a quienes van dirigidas sus atenciones o cuidados<sup>43</sup>. Los sentimientos del agotamiento emocional se consideran el iniciador del SQT<sup>45</sup>, al que se suman otras características centrales como son el desarrollo de actitudes negativas y cínicas hacia los destinatarios de la atención, la despersonalización, y la tendencia a creer que uno ya no es efectivo en el trabajo (reducción del logro personal).

Desde esta línea argumental la contagiosidad del SQT, entre los colectivos de las profesiones citadas, se produciría bien desde el contagio inconsciente (la tendencia a imitar expresiones faciales, vocalizaciones posturas) y en consecuencia a converger emocionalmente<sup>46</sup>, o desde la propuesta del contagio como proceso cognitivo consciente, al sintonizar con las emociones de los demás (atrapar las emociones de otro). Independientemente de la razón por la que pueda ocurrir el contagio, los investigadores de una variedad de disciplinas<sup>46, 47</sup>, han demostrado este tipo de transmisión, y los mecanismos fundamentales involucrados son similares en el agotamiento en sí y en el agotamiento emocional. Existen, además, evidencias sobre la depresión contagiosa<sup>48</sup>, la cual representa aproximadamente el 20% de la variación en el agotamiento emocional, síntoma central del agotamiento.

En el trabajo de Bakker y colaboradores<sup>49</sup>, después de controlar el impacto de los indicadores ya conocidos (estrés organizativo y componentes del modelo de control de la demanda de trabajo)<sup>50</sup>, implicados en el SQT, prueban la hipótesis del contagio del SQT, con cuestionarios validados (carga de trabajo objetiva, escala de libertad de decisión, escala de agotamiento percibido, agotamiento emocional, despersonalización y logros personales)<sup>43, 51-53</sup>, entre los equipos de Unidades de Cuidados Intensivos (UCI), en un proyecto europeo (EURICUS-I), que se llevó a cabo bajo el auspicio de la Fundación para la Investigación sobre Cuidados Intensivos en Europa (FRICE), en el que han participado un total de 3.000 enfermeras de ambos sexos, y 80 UCIs en 12 países europeos diferentes). En su análisis de regresión multinivel se constata que el agotamiento se comunica de una enfermera a otra, tanto consciente como inconscientemente, donde las quejas de agotamiento entre colegas contribuyen a explicar la variación en los niveles individuales de agotamiento de las enfermeras.

### **Conclusión:**

**Existen datos que demuestran que las quejas sobre el agotamiento pueden ser transmitidas entre colegas, tanto de manera consciente como inconsciente; además de resultar ser el factor predictor más importante para el agotamiento emocional y la despersonalización a nivel individual y de unidad. Esto sugiere que el SQT puede ser un cuadro que se contagie entre compañeros, particularmente en Unidades de Cuidados Intensivos.**

### **PREGUNTA 9.- ¿Cuáles son los profesionales médicos más afectados? ¿Hay especialidades de mayor riesgo?**

#### **Exposición:**

Las especialidades médicas con mayor riesgo de SQT son aquellas en las que la presión asistencial es mayor, sea por sobrecarga cuantitativa (como sucede en Atención Primaria), o por sobrecarga cualitativa, en relación con pacientes complejos, graves y de mal pronóstico, como sucede en las Unidades de Cuidados Intensivos, Oncología y Geriátrica, o bien por la dificultad de comunicación y trato con el paciente, como sucede en unidades de Salud Mental<sup>54</sup>.

Las especialidades mencionadas con mayores tasas son las que se encuentran en la primera línea asistencial. Se apunta que la informatización de la actividad clínica se ha convertido en causa de control por parte de la empresa y en factor de riesgo de SQT para la profesión en general y estas especialidades en particular. Entre los factores organizacionales, se ha señalado la exposición a estresores laborales tales como la sobrecarga de demandas en relación con los recursos y los refuerzos percibidos, la falta de control y autonomía, el deterioro del clima laboral y la falta de apoyo de la organización. Por eso no nos extrañará que los profesionales de especialidades como Cuidados Intensivos u Oncología, por ejemplo, en las que se trabaja con pacientes más graves y con mayor demanda de trabajo emocional, puedan presentar mayor riesgo de desgaste profesional y especialmente durante el periodo de formación MIR y entre los 25 y los 40 años<sup>54</sup>. En este sentido, existen estudios de casos registrados con resultados de incidencia altamente alarmantes: hasta un 70% de SQT en algunas poblaciones asistenciales<sup>42</sup>. Estos datos constituyen indicadores significativos del grado de insatisfacción y del malestar que, en todos los casos, debería ser tenido muy en cuenta por los gestores de los llamados Recursos Humanos del ámbito sanitario, igual que los índices de satisfacción del paciente en su relación con el médico y con el resto de los profesionales sanitarios.

Hoy en día, tanto en el ámbito nacional como internacional, se concluye de los estudios existentes que los rangos de prevalencia de SQT siguen siendo similares, aunque con tendencia a aumentar a medida que se deterioran las condiciones de trabajo del médico. Han disminuido la legítima autonomía profesional del médico y su estatus social y económico y han aumentado las demandas laborales. En

nuestro país, tanto la Organización Médica Colegial como la Confederación Estatal de Sindicatos Médicos han denunciado la ausencia de políticas efectivas de Recursos Humanos y la inestabilidad, precariedad y sobrecarga laboral. Hay mayores riesgos potenciales (como errores y denuncias judiciales), más agresiones a médicos y ha empeorado la formación de los residentes (en especial por una supervisión deficitaria), todo lo cual implica el deterioro de la calidad asistencial en Atención Primaria y Especializada. Estos problemas se agravan en el caso de la mujer médico, con mayor precariedad, acoso laboral y agresiones en su trabajo que sus compañeros varones, lo que implica la conveniencia de tener en cuenta, también en este tema, la perspectiva de género.

Importantes son también los factores organizacionales, entre ellos se han señalado la exposición a estresores laborales tales como la sobrecarga de demandas en relación con los recursos y los refuerzos percibidos, la falta de control y autonomía, el deterioro del clima laboral y la falta de apoyo organizacional.

Se han realizado varios estudios para analizar si el SQT es sólo un fenómeno individual, o si es también un fenómeno grupal y organizacional altamente contagioso, aunque ambas posibilidades no son excluyentes. Los resultados obtenidos hasta el momento señalan el mayor peso relativo de los factores grupales y organizacionales en la determinación del SQT, aunque la opinión convencional (errónea) sea que el SQT es primariamente un problema que tiene una determinada persona. Esto es, que la gente se quema por defectos en su carácter o en su conducta. Desde esta perspectiva, la persona que se quema es el problema, y en consecuencia la solución sería que el afectado cambie o desembarazarnos del afectado. En todo caso, lo prioritario es atender adecuadamente a estos compañeros, como se hace en el Programa de Atención Integral al Médico Enfermo, aunque teniendo en cuenta todos los factores de riesgo involucrados en su caso individual, con inclusión de los de tipo organizacional, personal, etc.

Los estudios evidencian que el SQT afecta a personas, pero es un problema del medio laboral en el que trabajan las mismas, y no una vulnerabilidad de ellas, salvo en algunos casos específicos. Diferentes investigadores han constatado que el SQT es producido principalmente por factores organizacionales, como: sobrecarga laboral, falta de control, recompensas insuficientes, ausencia de equidad, conflictos de valores, escisiones en el grupo de trabajo y falta de una adecuada supervisión<sup>55,56</sup>.

Los resultados de los estudios hasta ahora realizados recomiendan implementar políticas públicas que reduzcan la sobrecarga laboral para mejorar la seguridad de los pacientes y de los profesionales sanitarios. La estructura y el funcionamiento de la empresa configura cómo las personas interactúan entre sí y cómo llevan a cabo sus trabajos. Cuando la empresa no reconoce los aspectos humanos del trabajo, las personas y las relaciones se deshumanizan, aumentan los conflictos y el riesgo de quemarse, y esto conlleva un elevado precio económico y social.

### **Conclusiones:**

**El SQT tiene una incidencia desigual en las distintas especialidades médicas. Las de mayor riesgo son aquellas con mayor sobrecarga cuantitativa, como la Atención Primaria, por elevada presión asistencial, o con mayor sobrecarga cualitativa como Cuidados Intensivos, Oncología y Geriátrica por tratarse de pacientes complejos, graves y de manejo difícil, o bien por la dificultad de comunicación y trato con el paciente, como sucede en Salud Mental.**

### **PREGUNTA 10.- ¿Se podría incluir el SQT en el cuadro de enfermedades profesionales o es un accidente de trabajo?**

#### **Exposición:**

En el artículo 115 de la Ley General de la Seguridad Social se define el Accidente de Trabajo (AT) como toda lesión corporal que el trabajador sufra con ocasión o por consecuencia del trabajo que ejecute por cuenta ajena. Además, describe las situaciones que se incluyen en esta definición y dentro de ellas destaca las enfermedades, no incluidas en el artículo 116 (en este artículo, como veremos posteriormente se define el concepto de Enfermedad Profesional EP), que contraiga el trabajador con motivo de la realización de su trabajo, siempre que se pruebe que la enfermedad tuvo por causa exclusiva la ejecución del mismo<sup>57</sup>. En el artículo 116 de la citada Ley se define la Enfermedad Profesional (EP) como la contraída a consecuencia del trabajo ejecutado por cuenta ajena en las actividades que se especifiquen en el cuadro que se apruebe por las disposiciones de aplicación y desarrollo de esta Ley, y que esté provocada por la acción de los elementos y sustancias que en dicho cuadro se indiquen para cada enfermedad profesional<sup>57</sup>. Hasta el año 2007, el cuadro de enfermedades profesionales en vigor databa del año 1978 (Real Decreto 1995/1978, de 12 de mayo) y había quedado desfasado como consecuencia de los avances en los procesos industriales y del considerable progreso experimentado en el ámbito de la medicina. La actualización del listado de enfermedades profesionales se lleva a cabo con la publicación del RD 1299/2006 de 10 de noviembre, por el que se aprueba el nuevo cuadro de enfermedades profesionales. En ningún apartado del nuevo cuadro de enfermedades profesionales se incluyen las enfermedades psicosociales<sup>58</sup>.

Si avanzamos en las definiciones, nos queda definir las Enfermedades Relacionadas con el Trabajo. Son aquellas enfermedades que por sus características no pueden ser incluidas en los conceptos que definen el accidente de trabajo o la enfermedad profesional.

Situaciones como el acoso laboral, el SQT, el estrés laboral, el síndrome del edificio enfermo, etc., pueden ser extraordinariamente lesivas para el trabajador y, sin embargo, en la mayor parte de los casos, tienen la consideración y cobertura de una enfermedad común. En determinadas situaciones, si el trabajador

demuestra la relación existente entre la enfermedad y el trabajo (en la mayoría de los casos por vía judicial) se le da la categoría de accidente de trabajo.

A la vista de las definiciones, observamos que el SQT, no puede etiquetarse como EP porque no está en el listado de enfermedades profesionales del RD 1299/2006. Podría tener la consideración de AT, si tenemos en cuenta que se consideran AT las enfermedades no incluidas en el listado de EP que contraiga el trabajador con motivo de la realización de su trabajo, siempre que se pruebe que la enfermedad tuvo por causa exclusiva la ejecución de este. La dificultad que nos encontramos en este punto es que una parte importante de las Mutuas de Accidentes de Trabajo y Enfermedades Profesionales no reconocen que estas enfermedades tengan su causa de forma exclusiva en el trabajo y establecen la existencia de factores personales que favorecen la aparición de estas. Para establecer esta patología como contingencia laboral, en un número importante de casos el trabajador tendría que acudir a la vía judicial.

Es necesario promover una revisión del cuadro de enfermedades profesionales, y esta revisión debería estar orientada sobre todo a la inclusión de enfermedades relacionadas con los trastornos musculo-esqueléticos y con los riesgos psicosociales.

Según datos aportados por la Unión General de Trabajadores, en el año 2016 el 20% de las enfermedades ocasionadas por el trabajo no estaban recogidas en el cuadro de enfermedades profesionales, esto supondría que, aunque tienen un origen profesional, no son reconocidas como tales. En este documento se considera imprescindible una revisión del Real Decreto 1299/2006, con el objetivo de adecuar la calificación de la EP a la realidad actual. Además, propone implementar el cuadro español de enfermedades con la lista de Enfermedades Profesionales que en el año 2010 revisó y aprobó la Organización Internacional del Trabajo (OIT)<sup>59</sup>. En esta lista de EP, en el apartado 2, están las EP según el órgano o sistema afectado y observamos que se incluyen trastornos mentales y del comportamiento y concretamente en el apartado 2.4.1 estaría el trastorno de estrés postraumático, y: "otros trastornos mentales o del comportamiento no mencionados en el punto anterior cuando se haya establecido, científicamente o por métodos adecuados a las condiciones y la práctica nacionales, un vínculo directo entre la exposición a factores de riesgo que resulte de las actividades laborales y el (los) trastorno(s) mentales o del comportamiento contraído(s) por el trabajador.

La nueva lista de la OIT representa el último consenso mundial sobre las enfermedades que son aceptadas internacionalmente como causadas por el trabajo y puede servir de modelo para el establecimiento, el examen y la revisión de las listas nacionales de enfermedades profesionales.

Actualmente, en España, para establecer el SQT como contingencia laboral, el trabajador tendría que acudir a la vía judicial. Ya en el año 2000 hay una sentencia del Tribunal Supremo que respalda legalmente como Accidente de Trabajo al SQT. El especialista del centro de salud, en este caso, diagnosticó al trabajador un "síndrome de desgaste personal o de burnout, que describe como un trastorno adaptativo crónico con ansiedad como resultado de la interacción del trabajo o situación laboral en sus características personales"

A partir de esta sentencia se han originado otras que se han pronunciado en el mismo sentido y que han considerado igualmente accidente de trabajo el SQT.

**Conclusión:**

**El SQT, no puede etiquetarse oficialmente como Enfermedad Profesional en España por no estar incluido en la lista oficial de enfermedades profesionales del RD 1299/2006. Sin embargo, hay jurisprudencia, en nuestro país, que lo admite como Accidente de Trabajo.**

**PREGUNTA 11.- ¿Cuál es el tratamiento más adecuado? ¿Es igual para todos los profesionales o tiene vertientes específicas?**

**Exposición:**

Para el abordaje terapéutico del SQT tenemos que aceptar su aspecto multidimensional y la amplia gama de causas y mecanismos psicológicos que intervienen en su génesis. Sólo será posible un tratamiento global eficaz si enfrentamos de forma adecuada los diversos elementos que lo precipitan, con la utilización de diferentes herramientas terapéuticas.

Se han estudiado múltiples intervenciones para el manejo de este síndrome, pero su eficacia no está suficientemente contrastada. Existen dificultades metodológicas, numerosos estudios individuales con resultados internos válidos, pero difícilmente generalizables por falta de aleatorización. Por tanto, hoy por hoy, no hay suficientes datos que permitan recomendar una estrategia terapéutica concreta<sup>60, 61</sup>.

Las publicaciones recientes acerca del tratamiento del SQT están orientadas a intervenciones de carácter preventivo. Como hemos consensuado que la vinculación psicológica con el trabajo depende de factores individuales, interpersonales-grupales y organizacionales, las actuaciones terapéuticas tendrán que realizarse en estos tres niveles<sup>54, 62, 63</sup>.

El SQT puede llegar a considerarse una enfermedad profesional y un problema de Salud Pública. Por ello, las administraciones son responsables de elaborar leyes que incentiven a los profesionales, aumenten su motivación, mejoren el clima laboral y reconozcan su prestigio y competencia. También son necesarios programas de sensibilización a la población sobre la adecuada utilización del Sistema Sanitario, el cuidado de la imagen y el fomento del respeto hacia la figura del médico<sup>56</sup>.

Será importante añadir, a la extensa formación científica de nuestros profesionales, educación para el cuidado de la propia salud física y psíquica y la aceptación de su eventual vulnerabilidad y necesidad de ayuda; así como aspectos relativos a la interacción con los pacientes, la organización del trabajo, y los riesgos psicosociales.<sup>56</sup>

La Prevención en la organización se apoya en aquellas medidas que favorezcan el compromiso del médico, la disminución de los factores de riesgo del entorno laboral (el control de la excesiva sobrecarga laboral, del escaso tiempo para realizar la esencia de la tarea que es la atención al paciente, eliminar en lo posible la incertidumbre), la formación a los mandos en gestión de situaciones complejas, en habilidades de comunicación, y en manejo de conflictos<sup>(57,64-68)</sup>. En este

sentido, será fundamental que exista una cultura institucional de Prevención de Riesgos Laborales proactiva y accesible. Por su parte, las organizaciones sindicales disponen de interlocutores con experiencia que pueden orientar al profesional y mediar con las direcciones cuando sea necesario<sup>64</sup>.

La prevención a nivel de los grupos profesionales, de los equipos, se realiza fomentando el desarrollo de relaciones de apoyo mutuo y favoreciendo espacios de convivencia, el desarrollo de Códigos de Buenas Prácticas que promuevan el respeto y el cuidado entre los profesionales. Las reuniones, los talleres, los grupos de investigación y de formación, son mecanismos que sirven para favorecer el conocimiento mutuo, el sentimiento de pertenencia al grupo y la cohesión en los valores compartidos<sup>56 63</sup>.

A nivel individual nos protegerá frente al Desgaste una visión más realista con expectativas más ajustadas a la realidad profesional, la formación continuada y la búsqueda de competencias individuales; pero también un desarrollo vital donde la profesión sea un elemento más pero no el único, el fomento del autocuidado en un sentido amplio, que incluya el propio cuerpo, la salud, las relaciones humanas y el desarrollo de intereses ajenos a la profesión<sup>63</sup>.

La formación orientada al desarrollo de habilidades para el manejo de la escucha activa, la empatía, la gestión de las emociones negativas, las estrategias de afrontamiento, habilidades de comunicación, la asertividad y el control-reducción del estrés, han demostrado también su utilidad<sup>56</sup>.

El tratamiento, una vez instaurado el Síndrome, tiene tres vertientes. A nivel de la organización, será necesario un estudio adecuado del grupo humano, con evaluación periódica del clima laboral, y un compromiso con los Servicios de Prevención de Riesgos Laborales adecuadamente dotados, para que puedan entender las causas de fondo e instaurar medidas para devolver la salud a los profesionales dañados<sup>63</sup>. En este sentido que las direcciones apoyen las recomendaciones de rotación o de adaptación de puesto de trabajo que se realice desde estos servicios, y en coordinación con los Comités de Seguridad y Salud, será fundamental.

Cuando se detecten equipos especialmente afectados, la posibilidad de realizar Grupos de Apoyo con profesionales cualificados, puede ser terapéutico. Se han estudiado distintas estrategias psicoterapéuticas: grupos de entrenamiento en habilidades de comunicación, grupos psicoterapéuticos homogéneos y heterogéneos...<sup>63</sup>.

A nivel individual el tratamiento dependerá de la gravedad del mismo. En algunos casos una adecuada intervención desde el Servicio de Prevención de Riesgos laborales, con medidas sobre la actividad profesional que mejoren la auto percepción y la motivación, la rotación temporal en otra unidad, o una breve Incapacidad Transitoria o baja laboral que permita el descanso, tomar distancia del foco y la observación del desempeño cotidiano con mayor distancia emocional, puede ser suficiente<sup>56</sup>.

Cuando el síndrome esté instaurado, el tratamiento de elección es el psicoterapéutico.

El PAIPSE (Plan de Atención Integral del Profesional Sanitario Enfermo) está constituido por profesionales especialmente entrenados en el tratamiento integral de este síndrome, en coordinación con los Servicios de Salud Laboral.



Lo fundamental es que se comprenda como se ha llegado a este punto en función de variables biográficas, de personalidad, y de estilo de afrontamiento. Desde el conocimiento de los recursos y las defensas del paciente, el objetivo será potenciar y optimizar la capacidad adaptativa del profesional, el desarrollo de nuevas estrategias de afrontamiento del estrés y el entrenamiento en poner límites razonables a las demandas externas. Será importante comprender el papel que la identidad profesional juega en el mundo emocional del paciente, en la autoeficacia percibida y en la realización personal. Y todo esto desde la aceptación y el compromiso para realizar un recorrido personal que es indispensable para el cambio.

¿Es distinto en los diferentes grupos profesionales? Si entendemos el SQT como un proceso de desgaste que se origina en diversas profesiones caracterizadas por el amplio “gap” que existe entre la alta demanda emocional y la escasez de recursos para afrontarla, que terminan agotando al profesional, en función de su vulnerabilidad genética, biográfica y el estilo de afrontamiento individual, podemos considerar que el tratamiento tiene aspectos comunes a todas las profesiones (maestros, médicos, enfermeros...) y otros más claramente individuales<sup>65</sup>. En líneas generales, podemos afirmar que el abordaje preventivo orientado a reducir los estresores vinculados al SQT es común a las distintas profesiones. Sin embargo, las intervenciones terapéuticas parecen ser más eficaces cuanto más aborden el conjunto de elementos que inciden en este síndrome de una forma individualizada<sup>62</sup>.

No hay estudios que comparen el tratamiento del SQT en diferentes grupos profesionales. Las publicaciones se centran en determinadas intervenciones realizadas en equipos profesionales concretos (oncólogos, ginecólogos, profesionales del HIV, UCI emergencias...) en países distintos, en circunstancias muy diferentes, y difícilmente comparables. Ninguno tiene una muestra suficientemente amplia ni homogénea, ni se ha realizado una distribución aleatoria con grupos control, y en general, abordan alguna de las variables que intervienen en el *burnout*, pero no el problema de fondo de un modo integral.

De ahí que los resultados sean pobres y difícilmente extrapolables<sup>66-70</sup>.

En algunas publicaciones se estudia el impacto de una formación específica en habilidades de comunicación basadas en *workshops*, incorporando presentaciones con imágenes de un comportamiento ideal y *roleplaying*. Se mide el MBI antes, después de la formación y a los doce meses, observando una mejoría de las habilidades de comunicación, pero no del estrés, ni del SQT. Esto incide en que estamos ante un fenómeno sordo, corrosivo, que no tiene relación directa con elementos aislados que puedan enseñarse y mitigarse. Estos estudios concluyen que las intervenciones sobre las personas de forma aislada son insuficientes para producir cambios<sup>62</sup>.

En nuestra experiencia en el PAIPSE, el desgaste es especialmente lesivo entre los médicos de atención primaria. En estos profesionales confluyen varios estresores laborales como la enorme presión asistencial y el hecho de ser la puerta de entrada al sistema de usuarios especialmente afectados por la situación socioeconómica, cada vez más exigentes y menos respetuosos, que vuelcan su malestar y en ocasiones despiertan emociones negativas. La reducción del tiempo de atención, que dificulta la capacidad de escucha empática, así como la

burocratización de la tarea, imposibilita el contacto humano de calidad que define este grupo profesional<sup>63</sup>. La prevención es en nuestra opinión fundamental. Es muy difícil elaborar una mínima reordenación cognitiva que devuelva un sentido a la identidad del sanador, si no tiene tiempo ni para mirar al paciente, o “ni para sacar el fonendo del cajón”.

Todas las medidas orientadas a fomentar una Atención Primaria de calidad, con un mayor tiempo por paciente, una flexibilidad que permita la conciliación de manera efectiva, la formación continuada, las reuniones de equipo para compartir experiencias y abordajes a las dificultades comunes del día a día, son esenciales<sup>63</sup>.

Cuando estos profesionales consultan, suelen estar atrapados entre las variables laborales descritas, y el intento costoso desde un punto de vista intrapsíquico de mantener sus exigencias de la vida adulta: cuidado de hijos y/o padres ancianos, problemas relacionados con el grupo de apoyo o la pareja (divorcio, crisis...) y a veces enfermedades crónicas, que terminan de alterar el frágil equilibrio. En estos casos el tratamiento integral abarcará un abordaje psicoterapéutico y farmacológico en función de la sintomatología expresada.

Entre los **profesionales que trabajan en los hospitales** encontramos factores de protección ligados a la especialización de la tarea, la búsqueda de líneas específicas de capacitación, la docencia y la investigación. Son formas de dotar de sentido a la dura actividad asistencial diaria. Los casos que consultan en el PAIPSE suelen tener como desencadenante un largo historial de maltrato institucional o por parte de un superior, incluso algún miembro del equipo de trabajo, que ha dañado su carrera profesional. En ocasiones profesionales altamente comprometidos, que aman la profesión, son objeto de una envidia inconfesable por parte de superiores mediocres. Puede ser necesaria la intervención de los Servicios de Prevención de Riesgos Laborales y de los Comités de Seguridad y Salud, y un cambio de puesto de trabajo para salvar su salud psíquica y evitar un daño irreversible. El Protocolo de conflictos internos y frente a todos los tipos de acoso en las instituciones sanitarias, puede convertirse en un mecanismo de control eficaz de esta lacra.

Los profesionales de los Servicios de Urgencias o de las UCIs, están especialmente expuestos al contacto con la muerte, el duelo, la transmisión de malas noticias a las familias, y constituyen por tanto un grupo de especial vulnerabilidad. Serán medidas preventivas relevantes el entrenamiento en Habilidades de Comunicación, el manejo de emociones negativas y las reuniones de equipo, para abordar las dificultades en el afrontamiento de la enfermedad grave y la muerte.

En todos estos casos, un prolongado SQT puede incidir sobre un precario equilibrio psíquico y desestabilizarlo por distintas líneas de fractura individuales.

Podemos encontrarnos con **distintas presentaciones psicopatológicas**: somatización, hipocondría, insomnio, conductas desadaptativas, inicio o agravamiento de adicciones (alcohol, benzodiazepinas, opiáceos...), síntomas ansiosos y/o depresivos... Todos ellos pueden requerir tratamiento psicofarmacológico y psicoterapéutico específico.

### **Conclusión:**

**Se han estudiado múltiples intervenciones para el manejo de este síndrome, pero su eficacia no está suficientemente contrastada y, hoy por hoy, no hay suficientes datos que permitan recomendar una estrategia terapéutica concreta. Se requieren intervenciones en la organización, en los grupos profesionales y en el individuo. Algunas son genéricas y válidas para cualquier profesional y otras son específicas para determinados grupos profesionales como los facultativos de atención primaria, los oncólogos, intensivistas o los que atendían pacientes VIH en los primeros años, que tienen que elaborar y afrontar el continuo contacto con la muerte.**

### **PREGUNTA 12.- ¿Puede hablarse de curación total? ¿Cuál es el riesgo de recaídas?**

#### **Exposición:**

El SQT es un síndrome sin registro en los catálogos de trastornos que manejamos en asistencia pública y, por tanto, no disponemos de estadísticas respecto a curación o recaídas.

En la Comunidad Valenciana, por ejemplo, se utiliza el CIE-9 para el diagnóstico en asistencia primaria tanto por parte de los Médicos Generalistas como por parte de los Especialistas en Psicología Clínica y de los Psiquiatras, tanto en la medicina pública como en las mutuas colaboradoras de la Seguridad Social. No hallamos listado el SQT y no es, por tanto, diagnóstico para incapacidad laboral, sea por contingencia común o por contingencia profesional.

Si atendemos a los síntomas, muchos de los que se perfilan en el SQT se editan como *trastornos distímicos, depresión reactiva, trastorno depresivo recurrente o trastorno depresivo, no clasificado bajo otros conceptos*. O bien como *trastorno de adaptación mixto de ansiedad y humor deprimido*. O como *trastorno de ansiedad, no especificado*.

Todos, o casi todos, los pacientes diagnosticados bajo los epígrafes citados acuden a consulta del psicólogo tratados con una medicación similar. El par más frecuente es un Antidepresivo ISRS más una Benzodiacepina. Hay también pacientes que por presentar síntomas de insomnio reciben antiepilépticos, amitriptilina, o en algunos casos antihistamínicos. Estos tratamientos, si bien amainan la sintomatología, sobre todo la ansiosa derivada del estrés o de causas externas aparentes, ni curan el proceso depresivo ni el SQT.

Es a través de lo que generalmente denominamos psicoterapia como los síntomas pueden ir cediendo hasta desaparecer. Ello incluye tanto las terapias de orientación cognitiva, como las terapias de orientación psicoanalítica.

El riesgo de recaída será mayor sin intervención psicológica o lo será la duración del problema. La intervención psicológica ha de procurar un cambio subjetivo en el paciente que le permita volver a ser actor de su vida y no sólo objeto pasivo de las circunstancias que le afectan.

Las situaciones son muy distintas dependiendo que la atención sea pública o privada y también son diferentes si el empleador del enfermo es una empresa privada o el Estado. En el primer caso, generalmente, el enfermo será despedido si es joven o de mediana edad y tenderá a la jubilación si es de mayor edad, según sectores, 60 o 61 años o a prejubilaciones de empresa, si las hay. En el caso de la función pública, donde encontramos a muchos médicos, el costo de una larga baja y un proceso de reconocimiento de enfermedad profesional como lo sería el SQT, o la depresión mayor, no conlleva ni la pérdida de empleo ni de honorarios, pudiéndose reincorporar, además, en otro puesto, en algunas circunstancias.

En cada caso hemos de observar atentamente las circunstancias personales que contribuyen a cronificar el malestar y la sintomatología del cuadro diagnosticado al inicio del proceso.

### **Conclusión:**

**No hemos encontrado criterios claros de curación del SQT ni cifras que estimen la tendencia a la recurrencia tras una presunta curación.**

**PREGUNTA 13.- Desde la perspectiva de un Servicio de Salud Laboral hospitalario ¿Cuál es el coste personal del SQT? ¿Se asocia a un aumento de riesgo de suicidio? ¿Cuáles son las medidas esenciales de prevención? ¿Quién debe liderar y ser el motor de las mismas?**

### **Exposición:**

El coste que tiene el SQT es muy alto a nivel personal, laboral y social. Las manifestaciones físicas más frecuentes son: cefaleas, dolores musculares, pérdida de apetito, disfunciones sexuales y problemas de sueño. La fatiga crónica, para algunos autores, es el síntoma más frecuente. También aparecen trastornos gastrointestinales, cardiovasculares, infecciones recurrentes, etc.

En cuanto a las manifestaciones psíquicas destacamos:

Los síntomas afectivos o emocionales. Son personas sin ganas para emprender tareas y, con frecuencia, con depresión, sentimiento de fracaso y pérdida de autoestima. También podemos encontrar en las personas afectadas desesperanza, pesimismo y apatía y como consecuencia de los efectos descritos, aparece irritabilidad, insomnio, agresividad y falta de tolerancia.

Entre los síntomas cognitivos, destacamos la pérdida de expectativas en el medio laboral, que en ocasiones marca el inicio del proceso; la persona afectada tiene dificultades para concentrarse o para tomar decisiones. En general, hay una pérdida de valores, desorientación, falta de creatividad, cinismo, facilidad de distracción y un descenso en la productividad.

El aspecto conductual es otra dimensión importante del SQT. La despersonalización es una manifestación frecuente, la persona pierde la capacidad para planificar, proyectar y plantearse metas, especialmente laborales. Hay un aumento del absentismo, la rotación empresarial y las intenciones de abandonar la organización. Además, hay desorganización e incapacidad para tomar decisiones.

En cuanto a los aspectos sociales, se suele describir a la persona afectada como

alguien que tiende a aislarse y a encerrarse en su sentimiento de fracaso. A la pregunta sobre si el SQT aumenta el riesgo de suicidio, hay que indicar que la prevalencia del suicidio y la ideación suicida es más alta en los profesionales sanitarios. Estos resultados podrían estar relacionados con las condiciones y organización del trabajo en este sector y con la presencia de situaciones de ansiedad e impotencia. A esto se uniría la poca importancia que los sanitarios dan al cuidado de la salud mental, tendiendo a evitar el contacto con los servicios de salud mental por el temor al estigma social y a comprometer su carrera profesional<sup>7-75</sup>.

En los estudios publicados observamos que las especialidades con tasas más elevadas de suicidio son los anestesiólogos, psiquiatras, médicos de familia y residentes. Este dato, podría estar relacionado con el mayor acceso a métodos letales. Respecto a las formas de suicidio, se observó que en el sector sanitario destaca el uso de tóxicos, el fácil acceso a estos y los conocimientos sobre su uso podrían explicar este dato<sup>74</sup>.

Se han identificado diferentes factores psicosociales relacionados con un mayor riesgo de ideación suicida en profesionales sanitarios. Hay un estudio realizado por Fridner et al.<sup>71</sup> en 2012, que refiere que el 79,2% de los médicos con ideación suicida no habían buscado ayuda para depresión o SQT.

Shanafelt et al. encontraron relación estadísticamente significativa entre la ideación suicida y el SQT entre los cirujanos americanos<sup>72</sup>. La prevalencia de ideación suicida aumenta con la severidad del cuadro, independientemente de la existencia de depresión. En cuanto a las medidas de prevención, no hay dudas sobre la necesidad de poner en marcha estrategias dirigidas a eliminar o reducir los riesgos que origina el SQT. Aunque se hace hincapié en la intervención individual sabemos que las causas fundamentales están en el ámbito laboral. Los departamentos de recursos humanos y los servicios de prevención deben colaborar y desarrollar estrategias de prevención e intervención.

En general las medidas para prevenir el SQT se pueden encuadrar en tres niveles distintos de actuación. A nivel organizativo, cabría citar, entre otras, las siguientes medidas: establecer programas de acogida, descentralizar la toma de decisiones, establecer objetivos claros para los profesionales y líneas claras de autoridad y responsabilidad. Al mismo tiempo, deben definirse competencias y responsabilidades, adecuar las cargas de trabajo, mejorar la comunicación y promover la participación en la organización.

A nivel interpersonal, es preciso fortalecer los vínculos sociales entre los trabajadores, favorecer el trabajo en equipo y evitar el aislamiento. También se debe formar a gestores.

A nivel individual, se precisa realizar una orientación profesional al inicio del trabajo, diversificar las tareas y la rotación en las mismas. Es necesario poner en práctica programas de formación continuada. Formar al trabajador en la identificación y resolución de problemas y en el manejo de la ansiedad y el estrés; además se le debe entrenar en el manejo de la distancia emocional con el paciente, aumentar los recursos o habilidades comunicativas y de negociación, etc. Otra medida fundamental para la prevención del SQT es actuar sobre las condiciones laborales. Los médicos, en general, tienen trabajo a turnos y

nocturno, realizan guardias y tienen horarios laborales prolongados. Estos factores pueden incidir directamente en los hábitos de salud en el sueño y en la alimentación. Las condiciones de trabajo, en ocasiones, dificultan la conciliación de la vida familiar, social y de ocio, lo que puede actuar como factor de riesgo en procesos de este tipo.

Hay factores que establecen la necesidad de disponer de programas de intervención específicos para profesionales médicos afectados por SQT. Dentro de estos factores están: el miedo a la estigmatización que conllevan las enfermedades psiquiátricas, el miedo a perder la credibilidad entre compañeros y pacientes y la percepción de falta de confidencialidad de los servicios públicos. Sobre quién debe liderar y ser el motor de este trabajo, las actuaciones se deben liderar desde los Servicios de Prevención de Riesgos Laborales, pero actuando de forma conjunta con la Dirección del Hospital, especialmente con el departamento de Recursos Humanos y los Representantes de los Trabajadores (Comité de Seguridad y Salud). El técnico de prevención de riesgos laborales debe hacer especial hincapié en las causas del SQT a la hora de evaluar los riesgos e implementar acciones preventivas, estas medidas preventivas deben ir encaminadas a evitar y, en los casos que no sea posible, minimizar los factores de riesgo que pueden ser causa de desgaste profesional en los trabajadores. Los Servicios de Prevención deberían disponer de profesionales especializados en riesgos psicosociales para llevar a cabo una evaluación específica con el fin de proponer medidas preventivas adecuadas relativas a las condiciones de trabajo, tanto a efectos de intervención inmediata como a efectos de prevenir en un futuro que los riesgos causen daños a los trabajadores.

En cuanto a las actuaciones a desarrollar sobre las consecuencias que esta enfermedad tiene sobre la salud del trabajador, estas corresponden a la Unidad de Vigilancia y Control de la Salud y sería muy aconsejable disponer de personal especializado que pudiera trabajar en esta línea.

Los Servicios de Prevención también pueden intervenir cuando el trabajador está ya afectado. En estos casos se evaluarán los daños y se implementarán las medidas oportunas para evitar la progresión del cuadro. También es necesario actuar sobre los factores que incrementan la sensibilidad ante el riesgo psicosocial y los factores protectores y potenciadores de afrontamientos positivos tales como la competencia emocional, la resiliencia y otros que pueden aumentar los recursos de la persona.

### **Conclusión:**

**El coste que tiene el cuadro de SQT es muy alto a nivel personal, laboral y social. Las consecuencias de este síndrome afectan a la salud mental, a la salud física, a la calidad de vida y a la eficacia profesional del médico. La prevalencia de ideación suicida aumenta con la severidad del cuadro. Las medidas para prevenir el SQT se pueden encuadrar en tres niveles distintos de actuación: organizativo, interpersonal e individual. La prevención debe realizarse desde los Servicios de Prevención de Riesgos Laborales en colaboración con la Dirección del centro sanitario y los Representantes de los Trabajadores.**

## **PREGUNTA 14.- ¿Podríamos dimensionar el coste económico-laboral y para la sociedad del SQT? ¿Y muy particularmente el de la profesión médica?**

### **Exposición:**

El bienestar de los médicos contribuye a la calidad del Sistema Público de Salud. Informes procedentes de estudios realizados por todo el mundo sugieren que entre un tercio y la mitad de los médicos experimentan algún grado de SQT y sus efectos asociados tienen enorme repercusión sobre los sistemas de salud. Tales efectos varían, pero en relación a cálculos de coste económico para los gobiernos son fundamentalmente:

Descenso de la productividad

Absentismo laboral

Bajas por enfermedad

Disminución de las horas de trabajo

Jubilación anticipada

Cambios de profesión

Presentismo.

Dewa y col.<sup>73</sup> realizaron una revisión sistemática de la literatura para evidenciar los efectos del agotamiento sobre la productividad de los médicos entendida como pérdidas en horas de trabajo, número de pacientes atendidos, bajas por enfermedad, abandono de la profesión, jubilación anticipada y carga de trabajo. La búsqueda comprendía artículos publicados desde enero de 2002 a diciembre de 2012. Se identificaron 870 citas únicas, pero sólo 5 cumplieron los criterios de inclusión y exclusión exigidos. Los cinco artículos se realizaron en EE.UU., China, Hong Kong, Países Bajos, y otros 12 países europeos (Bulgaria, Croacia, Francia, Grecia, Hungría, Italia, Malta, Polonia, España, Suecia, Turquía y Reino Unido). Las tasas de agotamiento fueron variables. Ruitenburg y col.<sup>76</sup> encontraron un 6% de agotamiento entre médicos de hospitales holandeses. Soler y col.<sup>77</sup> encontraron en médicos de 12 países europeos que un 43% tenían alto agotamiento emocional, un 35% alta despersonalización y 39% baja realización personal. Siu y col.<sup>78</sup> describen que el 31% de los médicos de hospitales públicos de Hong Kong tenían agotamiento. Por último, Hoff y col.<sup>79</sup> en médicos de hospitales estadounidenses informaron una tasa de agotamiento del 3%.

Todos los estudios informaron relaciones negativas significativas entre las 3 dimensiones de SQT y la productividad entendida como días de baja por enfermedad, intención de cambiar de trabajo, intención de seguir practicando la medicina y capacidad de trabajo. Baja por enfermedad. - En relación con este parámetro los datos encontrados son contradictorios. Soler y col.<sup>77</sup> encuentran que las 3 dimensiones del SQT se asocian con un mayor uso de baja por enfermedad y aquellos médicos que tuvieron, al menos un día de baja al año, tenían una probabilidad significativamente mayor de informar sobre agotamiento emocional y despersonalización altos y realización personal baja. Siu y col.<sup>78</sup> por el contrario, no encontraron diferencias estadísticamente significativas en el promedio de días de baja por enfermedad en el último año, para los médicos de hospitales públicos con o sin agotamiento. Intención de cambiar de trabajo. - Se

ha demostrado que existe una asociación significativa entre agotamiento emocional y despersonalización alta y realización personal baja, con la intención de dejar el trabajo actual<sup>79, 80</sup>.

Intención de seguir practicando la medicina. - Hay indicios de que el SQT está significativamente asociado con la intención de abandonar la especialidad actual. Una encuesta realizada en EE.UU.<sup>79</sup> entre médicos de hospital encontró que más del 50% de los médicos encuestados que no estaban en riesgo de sufrir SQT planeaban continuar la práctica hospitalaria durante más de 10 años y sólo un tercio de los que estaban en riesgo de SQT. De estos últimos, el 44% tenían intención de continuar no más de 4 años.

Capacidad de trabajo. - Los médicos hospitalarios con puntuaciones altas, tanto para agotamiento emocional como despersonalización, tenían significativamente mayor probabilidad de tener una capacidad de trabajo "insuficiente" auto-percibido<sup>74</sup>.

Jubilación anticipada y pérdida de horas de trabajo. - El vínculo entre SQT y la intención de dejar la profesión, con la jubilación anticipada o el recorte de horas asistenciales, produce importantes pérdidas económicas tanto para el médico como para los sistemas de salud. Con el fin de calcular los costes de tales actitudes Dewa y col.<sup>81</sup> realizaron un estudio con el objeto de estimar el costo del SQT con relación a la jubilación anticipada y la reducción de horas de trabajo entre médicos en ejercicio en Canadá. Para ello, utilizaron una base de datos de la Asociación Médica Canadiense de enero de 2012. Se envió una encuesta a 8.100 médicos practicantes, seleccionados al azar de la base de datos mencionada y 3.213 respondieron (41% tasa de respuesta). Encontraron que los médicos que sufrían agotamiento mostraban insatisfacción laboral en un 35,6% de los casos y los que no lo sufrían sólo estaban insatisfechos un 4,5% ( $p < 0,001$ ). Junto a la insatisfacción también se realizaron estratificaciones por la edad y observaron que los médicos de familia de menos de 45 años con insatisfacción laboral, el 5,3% planeaban retirarse en los próximos dos años, frente al 0,2% de los que estaban satisfechos. Para los médicos de familia entre 45 y 54 años y entre los que tenían entre 54 y 64 años ocurre lo mismo entre insatisfechos y satisfechos (8,4% vs 1,2%;  $p < 0,001$  y 24,4% vs 11%;  $p < 0,01$  respectivamente). Similares resultados se encontraron con los datos de reducción de horas asistenciales.

Teniendo en cuenta los datos encontrados se intentó calcular el coste de pérdidas económicas causadas por los médicos que padecían agotamiento con respecto a los que no lo padecían. El coste total del agotamiento para todos los médicos que ejercen en Canadá se estima en 213,1 millones de dólares (185,2 millones por jubilación anticipada y 27,9 millones por reducción de horas de trabajo).

Por último, Hamidi y col.<sup>82</sup> de la Universidad de Stanford en EE.UU. publica datos similares, con una tasa de SQT de los médicos del 26%.

El 21% de los médicos que sufrieron uno o más síntomas de agotamiento en 2013 habían abandonado el centro en 2015 en comparación con sólo el 10% de los médicos sin síntomas de agotamiento. La pérdida económica estimada de dos años debido a la marcha de los médicos, por agotamiento, oscilaba entre 15.544 000 y 55.506.000 \$



### **Conclusión:**

**Los médicos con SQT tienen mayor absentismo laboral, abandonan la profesión anticipadamente con mayor frecuencia y se consideran menos productivos. Cálculos groseros estiman en 213 millones de dólares canadienses el gasto en dinero que supone este problema para el sistema sanitario de Canadá. No se dispone de dichos cálculos en España ni en muchos otros países.**

### **PREGUNTA 15.- ¿Cuál es la visión de este problema de los abogados laboralistas?**

#### **Exposición:**

A día de hoy, no existe una definición jurídica consensuada de lo que puede considerarse “Burn Out” o SQT. Sin embargo, en atención a la bibliografía consultada, parece que hay relativo consenso en que la aparición del síndrome puede relacionarse con el trabajo pues como consecuencia de sus síntomas, se percibe una considerable reducción y efectividad del rendimiento laboral. El 25 de mayo de 2019, la Organización Mundial de la Salud (OMS), ha incluido en su clasificación internacional de enfermedades el Síndrome del Trabajador Quemado, con el código QD-85 del ICD-11, [nueva referencia: <https://icd.who.int/browse11/lm/en#/http://id.who.int/icd/entity/129180281>] con las respectivas consecuencias que ello supone para los diferentes ordenamientos jurídicos. El hecho de que la OMS incorpore el SQT a su clasificación, pone el foco de atención en los Estados, que deberán adecuar sus respectivos listados de enfermedades profesionales modificando así su normativa interna. Asimismo, el hecho de que la OMS haya reconocido la enfermedad, también tiene implicaciones en el ámbito del estudio de las prevenciones laborales<sup>83</sup>. A parte de las consecuencias previamente mencionadas, la importancia del hecho también radica en que la OMS no modificaba su listado de enfermedades desde 1950, acontecimiento que muestra la importancia del mencionado síndrome a nivel internacional. La nueva clasificación internacional de enfermedades entrará en vigor el 1 de enero de 2022. En cuanto a su encuadramiento jurídico, entre otras, la sentencia del Tribunal Supremo de 26 de octubre de 2000 considera el “Burn out” como accidente de trabajo quedando en la misma probada la relación entre el síndrome y la relación laboral<sup>83</sup>. No obstante, su calificación jurídica como accidente de trabajo y no como enfermedad, hace necesario que el trabajador pruebe la relación causa – efecto por no encontrarse el mismo encuadrado entre los supuestos de accidente de trabajo que prevé el artículo 157 de la LGSS<sup>84</sup>. Como antecedente de esta sentencia, encontramos la Sentencia del Tribunal Superior de Justicia del País Vasco de 1999 en la que se establece que en el “Burn out” se da uno de los elementos imprescindibles para que podamos hablar de enfermedad profesional, faltando el requisito de tipificación previamente mencionado<sup>85</sup>.

Como se ha podido comprobar a través del análisis jurisprudencial llevado a cabo en la exposición, la apreciación de SQT en el trabajador tiene diversas consecuencias jurídicas entre las que se encuentran las siguientes<sup>86</sup>:

### **I. Reconocimiento del SQT como accidente de trabajo y su calificación como enfermedad común por el Tribunal Superior de Justicia de Andalucía**

El análisis del SQT en los tribunales encuentra su origen en la Sentencia del Tribunal Superior de Justicia del País Vasco de 2 de noviembre de 1999 en la que el *burnout* se dibuja como un “síndrome de desgaste personal, que se describe como un trastorno adaptativo crónico de ansiedad, como resultado de la interacción de trabajo o situación laboral en sus características personales.” De este modo, el Tribunal Superior de Justicia del País Vasco, reconoce por primera vez el carácter profesional del síndrome con la respectiva consecuencia jurídica para el trabajador: se declaró su incapacidad temporal por contingencia profesional. A su vez, el Tribunal Superior de Justicia de Cataluña, en su sentencia de 20 de enero de 2005 también reconoce el SQT como contingencia profesional argumentando que, el problema psicofísico que padece el trabajador se produce únicamente al enfrentarse a grupos de alumnos, lo que excluiría la reproducción de la patología incapacitante fuera del ámbito laboral confirmándose por la instancia el grado de incapacidad permanente.

Por su parte, la sentencia del Tribunal Superior de Justicia de Andalucía (Granada), entiende que la situación de incapacidad temporal deriva de enfermedad común ya que la actora venía presentando una sintomatología depresiva que sólo a partir de 2008 puede relacionarse con sobrecarga laboral.

### **II. El SQT y su efecto incapacitante**

Además de pronunciarse sobre si el SQT debe considerarse contingencia profesional, la jurisprudencia también determina las diferentes incapacidades que pueden derivar de un diagnóstico SQT. La sentencia del Tribunal Superior de Justicia de Andalucía de 30 de enero de 2008 estima un grado de incapacidad total para la **profesión habitual** al entenderse que el trabajador puede realizar tareas sedentarias mientras que el Tribunal superior de Justicia de Cataluña concluye que la descripción de las dolencias presentadas por la trabajadora no permite la consideración de que pueda alcanzar carácter incapacitante sólo para la profesión habitual.

### **III. El SQT ¿Procedencia del reconocimiento de la indemnización por daños?**

La responsabilidad empresarial en caso de diagnóstico SQT sólo cabe en el caso de que exista culpa o dolo a tenor de lo establecido en el artículo 1101 del código civil. La sentencia del Tribunal Superior de Justicia de Cantabria de 17 de marzo de 2004 declara que no es suficiente la declaración de responsabilidad empresarial por el mero vínculo trabajo –enfermedad. No sería suficiente para una indemnización pecuniaria que se constate la relación causa- efecto entre daños psíquicos y trabajo. A la misma conclusión llegan las sentencias del Tribunal Superior de Justicia de Aragón de 1 de marzo de 2006 y del Tribunal Superior de Justicia de Galicia de 31 de octubre de 2002.

#### **IV. El SQT y la aplicación del recargo de prestaciones**

La sentencia del Tribunal Superior de Justicia de Cataluña de 14 de septiembre de 2010 entiende ajustada a derecho la aplicación del recargo de prestaciones del 30%, teniendo en cuenta que los riesgos psicosociales son riesgos psicosociales en sentido estricto, debiéndose incluir los mismos por lo tanto en el sistema preventivo de la empresa como los demás riesgos contemplados en la ley de prevenciones riesgos laborales. Por último, cabe mencionar que, en cuanto a la prevención de riesgos laborales, es necesario recordar la obligación positiva de los empresarios de realizar acciones para evitar su aparición. Tal y como se establece en la Sentencia del Tribunal Superior de Justicia de Cataluña de 14 de septiembre de 2010, existe la posibilidad de imponer a la empresa el recargo de prestaciones por infracción de sus obligaciones en materia preventiva.

Los últimos pronunciamientos de los tribunales respecto al SQT han ido en la línea jurisprudencial ya mencionada, declarando el síndrome de "Burn Out" como accidente laboral y reconociendo la incapacidad permanente total a un trabajador como consecuencia del padecimiento de esta dolencia.

Como ya hemos adelantado, el encuadramiento jurídico de la patología a día de hoy sigue siendo el de accidente de trabajo por no encontrarse la misma tipificada aún a nivel nacional como enfermedad profesional del artículo 157 de la Ley General de la Seguridad Social. Sin embargo, la mejor opción, reside en considerar el "Síndrome del Trabajador Quemado" como enfermedad profesional donde encaja perfectamente de manera natural en su condición de "enfermedad."

#### **Conclusión:**

**Desde la perspectiva del derecho del Trabajo, y en base a la jurisprudencia dictada por los Juzgados y Tribunales del Orden Social, a pesar de la existencia de pronunciamientos jurisprudenciales contradictorios, puede concluirse que el SQT ha sido reconocido mayoritariamente como accidente de trabajo. Es altamente probable que la incorporación del "Burn Out" a la clasificación internacional de enfermedades de la OMS sirva para el cambio paulatino en la determinación de contingencia e introduzca un cambio en el tratamiento que los Tribunales han hecho hasta la fecha del "Burn Out".**

**PREGUNTA 16.- ¿Cuál es la posición y la visión del SQT por parte de las organizaciones sindicales?**

#### **Exposición:**

El origen del SQT, depende de variables de personalidad, sociodemográficas individuales o de entorno personal y además se ve muy influido por el entorno laboral y las condiciones de trabajo. La Ley 31/1995 de 8 de Noviembre<sup>87</sup> y las reformas incluidas en la Ley 54/2003<sup>87bis</sup>, de 12 de diciembre de 2003, garantiza el derecho de los trabajadores a la salud y a la prevención de enfermedad como consecuencia del entorno laboral:

**El artículo 14 de la Ley 31/1995** obliga al empresario o las Administraciones Públicas a realizar la prevención de los riesgos laborales (PRL) mediante la

integración de la actividad preventiva en la empresa, la implantación y aplicación de un plan de prevención de riesgos en el trabajo, la evaluación de riesgos laborales (RL) y la actuación preventiva en casos de emergencia y de riesgo grave. Además, deben realizar la información, consulta y formación de los trabajadores sobre RL, la vigilancia de la salud y un seguimiento permanente de la actividad preventiva, con el fin de perfeccionar de manera continua las actividades de control de riesgos.

□ **El artículo 34 de la Ley 31/1995**<sup>87</sup> reconoce a los trabajadores el derecho a participar en las cuestiones relacionadas con la PRL, a través de sus representantes y de la representación especializada. A los Comités de Empresa, a los Delegados de Personal y a los representantes sindicales les corresponde, en los términos que les reconocen la normativa vigente, la defensa de los intereses de los trabajadores en materia de PRL.

□ **El artículo 35 de la Ley 31/1995**<sup>87</sup> recoge la figura de los Delegados de Prevención como representantes de los trabajadores con funciones específicas en materia de PRL y el **artículo 36** establece las competencias y facultades. En una encuesta realizada en 2018 en España, el 37% de los médicos reconocía que sufría SQT y el 7% estar deprimido. Los 5 principales factores que contribuían al desgaste profesional de los médicos se relacionan con el deterioro de las condiciones laborales y el escaso reconocimiento profesional: salarios insuficientes, burocratización de la asistencia, falta de respeto de administradores, colegas o pacientes, exceso de horas de trabajo, pobre reconocimiento profesional (Tabla 1)<sup>88</sup>. El 10% de los médicos estaba insatisfecho con su vida laboral. A pesar de reconocer el desgaste profesional y la depresión, solo 1 de cada 10 médicos estaba pensando o ya había solicitado ayuda profesional.

La crisis económica, iniciada a mediados de 2008 que se prolongó hasta el 2014, ha supuesto un notable incremento de las demandas físicas y emocionales a los profesionales de la salud. Además, la reducción de los presupuestos destinados a la sanidad ha intensificado el deterioro de las condiciones laborales de los profesionales de la sanidad española <sup>89</sup>:

□ Se redujo el poder adquisitivo de los médicos, de tal forma que en 2019 es un 17,5% inferior al de 2010. Además, las diferencias salariales con los de otros países de nuestro entorno y entre los médicos españoles en relación del lugar del territorio donde residen, se han intensificado.

□ Ha aumentado el grado de temporalidad y precariedad en las contrataciones en los centros sanitarios.

□ Se ha incrementado la duración de la jornada laboral semanal.

□ No se han incrementado las plantillas de médicos en labores asistenciales en el SNS, para atender a la creciente demanda de servicios de la población. El número de recursos en hospitales y centros de salud no han experimentado ningún incremento desde 2010<sup>90</sup>.

Corregir el deterioro de las condiciones económicas, laborales y profesionales del médico, han sido temas habituales en los ámbitos de negociación entre las organizaciones sindicales y las diferentes Administraciones Sanitarias en los últimos años.

Lamentablemente, en la negociación han primado los criterios economicistas cortoplacistas, sin tener en cuenta que la mejora de las condiciones laborales y

profesionales de los médicos también mejora la salud y el bienestar de los trabajadores y de la población a la que atienden.

Por otro lado, aunque la estructura organizativa para ejercer la PRL de acuerdo la Ley 31/1995 está prácticamente implantada en todos los centros sanitarios del SNS, esta normativa no está plenamente desarrollada:

No existe suficiente sensibilidad por parte de los actores implicados (Administración, trabajadores, SPRL) a la influencia del estrés laboral, los factores de riesgo psicosociales y la calidad del empleo, en materia de prevención RL. Se tiende a percibir como implícito al puesto cualquier carga psíquica o riesgo psicosocial del trabajo y a relacionar con la vulnerabilidad individual o con el entorno extralaboral cualquier deterioro de la salud de los trabajadores. Con frecuencia se demora la intervención sobre el estrés laboral y su consecuencia como el SQT.

Las instituciones sanitarias no realizan vigilancia periódica de la salud, ni seguimiento permanente de las actividades preventivas. No muestran proactividad para realizar la evaluación de los RL y la planificación de las actividades preventivas. Las evaluaciones suelen realizarse casi siempre a solicitud de los trabajadores o de los delegados de prevención.

No se realizan de forma sistemática actividades de información, consulta y formación de los trabajadores sanitarios y a los delegados de prevención sobre RL. Algunas propuestas para mejorar el control de los RL de los profesionales sanitarios serían:

1. Mejorar las condiciones laborales de los médicos a través de la negociación con las organizaciones sindicales en las mesas sectoriales.
2. Mejorar los sistemas de información e investigación sobre las condiciones de trabajo y los daños sobre la salud de los trabajadores sanitarios.
3. Aumentar las actividades de formación de los trabajadores y de los delegados de prevención.
4. Potenciar las actuaciones de vigilancia del estado de la salud para detectar precozmente los daños derivados del trabajo y realizar las actividades preventivas correspondientes.
5. Facilitar el desarrollo de las funciones y competencias de los delegados de prevención.
6. Facilitar el trabajo de los SPRL.
7. Agilizar los procesos de inspección de Trabajo y de sanción en los casos de incumplimientos en materia de PRL.

**Tabla 1. Factores que contribuyen al SQT**

|                                                                         |     |
|-------------------------------------------------------------------------|-----|
| • Remuneración insuficiente                                             | 56% |
| • Demasiadas tareas burocráticas (por ejemplo, administración, papeleo) | 47% |
| • Falta de respeto de administradores/empleadores, colegas o personal   | 36% |
| • Invierto demasiadas horas en el trabajo                               | 26% |
| • Me siento como una pieza más de un engranaje                          | 23% |
| • Falta de respeto de los pacientes                                     | 21% |
| • Énfasis en las utilidades, más que en los pacientes                   | 18% |
| • Computarización creciente de la consulta (expediente electrónico)     | 15% |
| • Falta de control/autonomía                                            | 11% |
| • Regulaciones gubernamentales                                          | 7%  |
| • Reembolsos decrecientes                                               | 7%  |
| • Mantenimiento de los requisitos de certificación                      | 2%  |
| • Otros                                                                 | 10% |
| 88                                                                      |     |

**Conclusión:**

La crisis económica, iniciada a mediados de 2008, ha supuesto un notable incremento de las demandas físicas y emocionales a los profesionales de la salud lo que, unido a los recortes en los presupuestos sanitarios, ha agravado el estrés psicosocial al que se ven sometido los facultativos y el resto de profesionales sanitarios. Los servicios de Prevención de Riesgos Laborales están implantados en los Servicios de salud, pero las diferentes

## **instituciones sanitarias no cumplen con la normativa específica en materia de prevención de riesgos laborales.**

### **PREGUNTA 17.- ¿Qué conocimiento tiene y cómo trata la prensa no especializada el problema del SQT?**

#### **Exposición:**

La Fundación del Español Urgente (Fundeu), promovida por la Agencia EFE y la entidad financiera BBVA, han aclarado que la expresión “síndrome de desgaste profesional”o, más coloquialmente, “síndrome del trabajador quemado” son alternativas en español al anglicismo “*burnout*”.

La Agencia EFE es el gran productor y distribuidor de noticias para el resto de los medios de comunicación en España y Latinoamérica; por lo tanto, los datos mencionados pueden suponer que el resto de los medios de comunicación generalistas habrán publicado un número similar de informaciones relacionadas con el síndrome de Burnout.

Los datos del Servicio de Archivo y Documentación de la Agencia EFE nos pueden aproximar a las respuestas de las dos preguntas que formula la ponencia:

1. La Agencia EFE ha publicado 8.245.500 noticias de texto de cualquier temática durante los últimos 20 años.

2. Solo 335 de estas noticias están relacionadas con el síndrome de *Burnout* o el SQT, es decir, el **0,004%** de todas las noticias enviadas a sus abonados.

3. De las 335 noticias, 21 mencionan el SQT en el titular de la noticia.

4. El contenido informativo de la mayoría de estas 335 noticias está relacionado con el mundo laboral en general y gira en torno al término “estrés”. El SQT aparece como una consecuencia más del estrés a largo plazo en algunas profesiones, como la educación, la sanidad o la seguridad.

5. Aproximadamente, el 10% de estas 335 noticias tratan del SQT en relación con la profesión médica.

Regulaciones gubernamentales 7%

Reembolsos decrecientes 7%

Mantenimiento de los requisitos de certificación 2%

Otros 10% <sup>88</sup>.

6. En los últimos 10 años, sólo 11 noticias están relacionadas con el SQT en la profesión médica o en la enfermería.

7. A fecha de 28 de mayo de 2019, la última noticia publicada por la Agencia EFE sobre las consecuencias de este síndrome fue del día 23 de mayo del mismo año: Se ha jubilado la exnadadora Ruta Meilutyte, de 22 años, después de llegar a lo más alto con una medalla de oro en los Juegos Olímpicos de Londres de 2012. Entonces tenía 15 añitos.

Desde el punto de vista multimedia, solo se han elaborado dos reportajes con el foco puesto en el SQT relacionado con el personal médico o sanitario.

El archivo gráfico de la Agencia EFE, con 20 millones de fotografías (8 millones de ellas digitalizadas desde octubre de 1998, que se pueden adquirir en [www.lafototeca.com](http://www.lafototeca.com)), sólo contiene tres fotografías etiquetadas con síndrome de *Burnout* (dos corresponden a una comandante de aeronave con diagnóstico del síndrome y otra ofrece una imagen de una reunión de expertos que analiza este trastorno psicológico o psiquiátrico).

□ [www.efesalud.com](http://www.efesalud.com), web de salud de la Agencia EFE, que solo divulga reportajes y noticias del ámbito sanitario, ha publicado seis informaciones en los últimos siete años relacionadas con el SQT.

¿Todos estos datos y ejemplos demostrarían que no existe interés periodístico por el SQT?

No, por supuesto; simplemente nos encontramos ante una cuestión que está fuera de la actualidad informativa diaria y, además, el síndrome de *Burnout* es una enfermedad casi desconocida por la población, a diferencia del estrés, que sí es una realidad enfermiza que sienten en sus propias carnes la inmensa mayoría de la población mundial.

Es necesario apuntar aquí, además, una máxima periodística: “Lo común no suele ser noticia”.

Si un perro muerde a una persona no es noticia; si la persona muerde al perro se convierte rápidamente en noticia... y hoy en día, si este suceso imprevisto se ha grabado en vídeo se podrá convertir en uno de los vídeos más virales de la semana. Por añadidura, se podría decir que, si una serie de perros muerden a otras tantas personas, especialmente a niños o bebés, la sociedad vive este conjunto de sucesos con cierta intranquilidad o miedo; incluso se podría abrir un debate público. El hecho se convierte en noticia por acumulación de casos. Por lo tanto, si el estrés es muy común a nivel laboral y familiar; si la mayoría de las personas entienden que el estrés está íntimamente unido al trabajo, más aún en puestos laborales que entran en contacto directo con otras personas externas a la organización, como los médicos; si apenas se habla del síndrome de *Burnout* en los medios de comunicación (prensa escrita, radio, televisión, digital); y ningún profesional afectado “muerde” a un compañero o a un paciente, estamos ante un pez que no se encuentra la cola.

Esta situación poco mediática del *burnout* se puede corroborar con varios ejemplos llamativos, pero poco conocidos, de noticias sobre la cuestión que también pasan desapercibidas para la población:

□ En México, El 75% de los trabajadores mexicanos padecen *burnout*, lo que coloca al país en primer lugar a nivel mundial en esta categoría, seguido por China, con el 73%, y Estados Unidos, con el 59%, según cifras de la Organización Mundial de la Salud.

□ También en México, el 25% de los infartos están relacionados con el estrés laboral.

□ En Europa, el 50% del absentismo laboral está justificado en el estrés laboral, lo que supone costes superiores a los 20.000 millones de euros/año en concepto de tiempo perdido y gasto sanitario.

□ En España, entre el 12% y el 30% de los médicos están más o menos afectados en algún grado por el SQT.

Para reforzar esta idea del escaso conocimiento que tiene la población mundial acerca del *burnout*, se pueden obtener datos muy interesantes relacionados con las búsquedas por palabras clave en el consultorio internauta del “Dr. Google” (Figura 2)



Figura 2.- Búsquedas con la palabra *Burnout* en Google

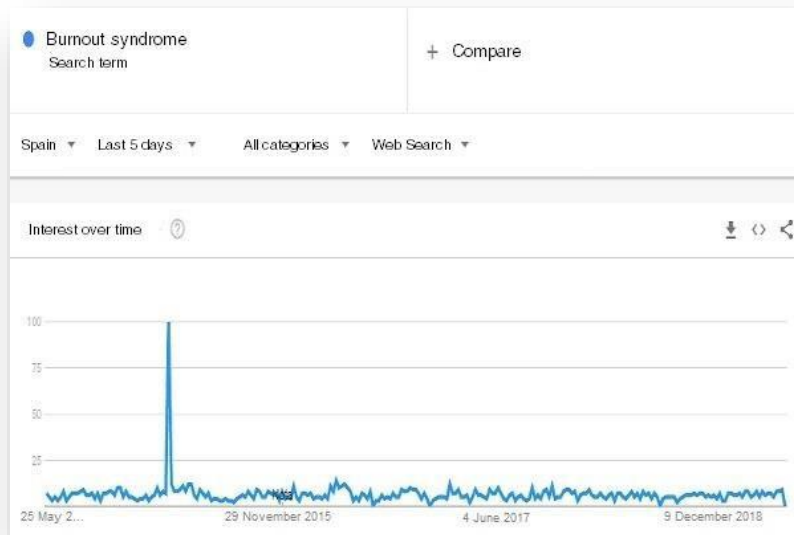

Las búsquedas se producen, sobre todo, en octubre y noviembre (los meses posteriores a las vacaciones de verano -julio, agosto y septiembre en Europa-) o en febrero, marzo, abril (mes en el que también baja el número de búsquedas por la Semana Santa) y mayo. En los meses de diciembre y enero también bajan las búsquedas de la palabra *burnout* por las vacaciones de Navidad (Figura 3).

Figura 3.- Evolución sobre las búsquedas sobre "burnout"

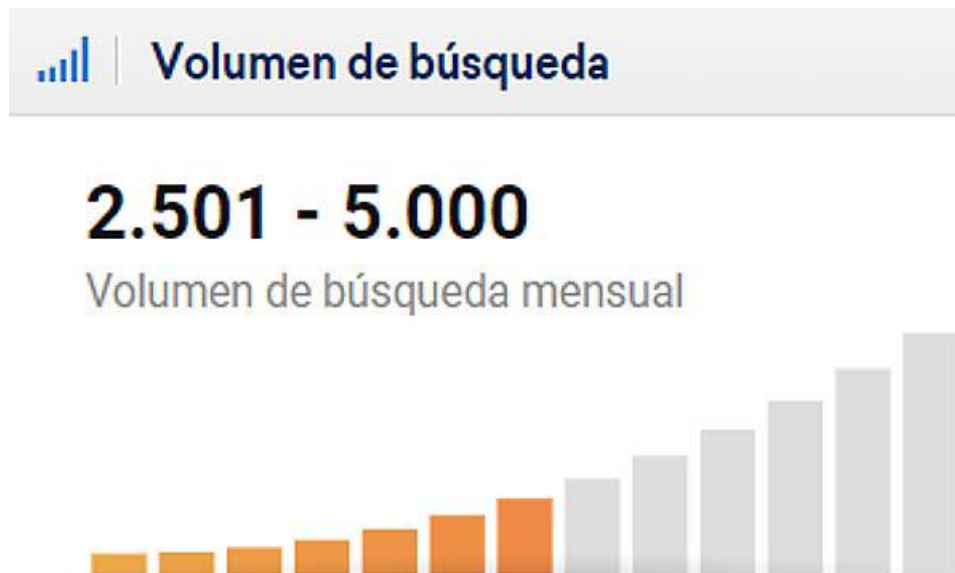

El término “síndrome del trabajador quemado” apenas se busca en Google.

- Casi todas las noticias que aparecen en la web buscando “*burnout*” tienen un origen en informaciones de contenido anglosajón o germánico.
- En los últimos cinco años, *burnout* se ha mantenido como una palabra que se busca poco; pero en cambio, se busca de manera constante, algo positivo que puede ser la base para un desarrollo futuro de información relacionada con este síndrome (Figura 4).

Figura 4.- Estacionalidad de las búsquedas sobre

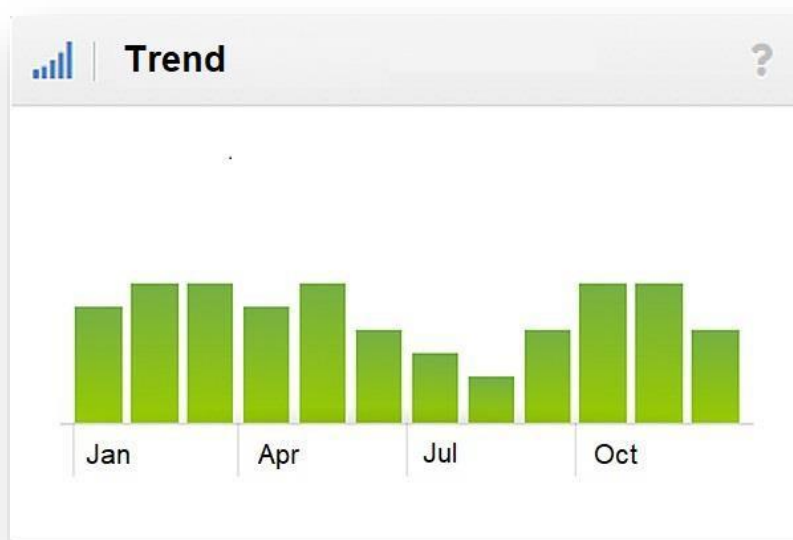

Un buen ejemplo para aprovechar sinergias informativas y repercusión social podría ser que la OMS ha incluido el síndrome de *Burnout* en la Clasificación Internacional de Enfermedades CIE-11, que entrará en vigor el 1 de enero de 2022, según todas las previsiones.

Esta noticia, que se ha publicado en la inmensa mayoría de diarios digitales españoles, quienes además aportan en su contenido apuntes sobre las características de este trastorno psicológico, serviría como banderín de enganche para los próximos años.

En condiciones normales, esta noticia de alcance se comentará durante unos días en el ámbito laboral o durante la cena familiar, con el permiso de la televisión; o, quizá, algún medio de comunicación aproveche la percha informativa para ampliar el hecho noticioso con más detalles, análisis de la situación por países e incluso pulse la opinión de especialistas sobre la prevención, el diagnóstico, el tratamiento y las consecuencias del *burnout*. Después volverá a su habitual ostracismo informativo.

El SQT sólo volverá a las portadas periodísticas cuando alguna persona famosa sufra este síndrome, como la joven nadadora olímpica que se ha jubilado; por un suceso doloso o violento relacionado con alguien que sufra el trastorno; por una sentencia judicial que sea muy llamativa o ejemplarizante; o por un reportaje en el suplemento dominical o de salud de cualquier periódico de tirada nacional.

Ante esta situación, las asociaciones de médicos y de enfermería deberían insistir en que los medios de comunicación pongan el foco informativo en este síndrome, que afecta 10%-30% de los profesionales: ruedas de prensa periódicas donde se ofrezcan datos, tanto del resultado de estudios analíticos como de prevalencia u otras circunstancias relacionadas.

Pero, sobre todo, deben facilitar el acceso a casos reales de pacientes con SQT, con voz y rostro, especialmente a aquellos medios que conectan y empatizan con la audiencia a través de los dispositivos móviles y la televisión. La acumulación de casos, como explicaba, tiende a iniciar el debate público.

### **Conclusión:**

**El interés por el SQT o “burnout” se demuestra en el registro de la agencia EFE donde ha estado presente sólo en un 0,004% de todas las noticias enviadas a sus abonados. Sólo en aproximadamente un 10% de las mismas se hace referencia a médicos. Por ser un asunto común, no se convierte en noticia.**

### **PREGUNTA 18.- ¿Creemos que hay demanda de un gran estudio nacional sobre SQT en la profesión médica? ¿Qué piensan los Colegios de Médicos?**

#### **Exposición:**

Consideramos que sería necesario y muy conveniente que pudiera realizarse el estudio de la prevalencia del SQT a nivel nacional, como ya se ha hecho en otros países, con muestras representativas de médicos de las diferentes especialidades, y especialmente de facultativos MIR y de otros profesionales sanitarios, con inclusión de las condiciones objetivas de la organización y de las tareas que realiza cada trabajador, así como las percepciones subjetivas personales (del SQT, satisfacción laboral, calidad de vida, etc.). Se trataría de un estudio multinivel, de grandes grupos, de gran complejidad metodológica, y que deberá incluir médicos de Atención Primaria y Especializada, del ámbito rural y urbano, de pequeños y grandes centros, etc.

Para ello sería necesario contar con los Servicios de Prevención de Riesgos Laborales que existen en todas las Áreas de Salud de las diferentes Comunidades Autónomas, y que tienen encargado por ley la prevención de riesgos psicosociales tales como el SQT, por los técnicos de Psicología Aplicada y Ergonomía y por los Médicos del Trabajo. Los médicos tienen aún bastantes posibilidades de seleccionar su especialidad, pero esa autoselección no implica necesariamente que estén capacitados para ejercerla en todos los casos. De hecho, todos conocemos casos de elección inadecuada de especialidad y de las consecuencias que ocasiona. En este sentido es muy importante el papel de los Servicios de Prevención para valorar la aptitud de un profesional a un puesto de trabajo

concreto, así como para ver la posible adecuación o adaptación de la persona al puesto de trabajo.

Por otra parte, es necesario poner de manifiesto que el sistema ya cuenta con la normativa que regula la asistencia a los profesionales sanitarios quemados por el trabajo desde 1995, con la ley de prevención de Riesgos Laborales. Pero, deberíamos preguntarnos ¿por qué apenas se emplea este procedimiento, salvo en casos graves y habitualmente crónicos y complicados? Desde luego, todos deberíamos hacer autocrítica acerca de cómo se están gestionando los Servicios de Prevención, si se les ha dotado de los medios necesarios para poder realizar con eficacia su misión, y si dada la magnitud de los problemas que deben afrontar, deberían reestructurarse y dotarse de más recursos. Es labor de todos luchar contra el estigma de la enfermedad mental y promover el reconocimiento y la petición de la ayuda profesional adecuada para este tipo de padecimientos, igual que podemos hacer para otros problemas médicos.

Si fuera posible económicamente, convendría incluir indicadores fisiológicos y metabólicos para analizar el daño a la salud personal, como por determinaciones de estrés oxidativo celular, porque todo tipo de estrés psicosocial al final acaba siendo estrés oxidativo a nivel celular<sup>91</sup>.

También sería conveniente incluir medidas de satisfacción de los pacientes, ya validadas y disponibles en nuestro país<sup>92, 93</sup>. Moreno-Jiménez y colaboradores validaron el cuestionario para la evaluación de la relación médico-paciente con 9 ítems de Cristina Van der Felz-Cornelis y cols<sup>94</sup>.

Para todo ello, siempre se podrá contar con el apoyo de los diferentes Colegios de Médicos provinciales, así como con la Organización Médica Colegial.

### **Conclusión:**

**La Organización Médica Colegial (OMC) cree que el SQT es un grave problema entre los médicos y que los datos parciales de los que se dispone en España justificarían un gran estudio nacional sobre el tema. El estudio debería tener un gran rigor metodológico e incluir la adecuada proporción de médicos trabajando dentro y fuera del medio hospitalario y dentro y fuera del medio urbano, así como tanto en el ámbito de la sanidad pública como en de la privada.**

### **PREGUNTA 19.- ¿Qué papel juegan o deberían jugar las Humanidades en la prevención y tratamiento del SQT?**

#### **Exposición:**

Un reciente meta-análisis intentaba resumir las intervenciones que previenen y tratan el SQT 95, y concluyó que las estrategias efectivas se dividen en individuales (*mindfulness*, entrenamiento en la gestión del estrés o sesiones de trabajo en grupos pequeños) y de organización del sistema (evaluaciones del horario laboral y modificaciones locales de procesos clínicos).

Aunque con un menor nivel de evidencia, las Humanidades y las Artes pueden ayudar a prevenir o reducir el SQT 95, 96. La Medicina del Siglo XX se tecnificó gracias a incorporar los múltiples descubrimientos y avances científicos en etiología, diagnóstico y tratamiento de las enfermedades. Desgraciadamente, la

relación médico-paciente se deterioró, pasando a una relación de superioridad, con escasa comunicación y cero empatía, incluso derivando los sentimientos fuera del ámbito médico, y el cuidado y afectos circunscribirlo a enfermería, o incluso a otros profesionales como psicólogos. La formación en las Facultades de Medicina se realiza en ausencia de arte y produce, por lo tanto, médicos sin arte. Cuando alguien decide convertirse en médico, parece que todo converge en una capacitación en el campo científico técnico, con una orientación exclusiva hacia la enfermedad y no hacia la salud o la persona.

Se enseñan materias muy específicas, dejando poco o ningún espacio y tiempo para la cultura, los deportes, la música y otras artes. Los intereses culturales se consideran superfluos, y no se evalúan durante la carrera ni en el examen MIR. Pero las Artes deben considerarse como la base de las humanidades y el crecimiento personal del médico <sup>95, 97-100</sup>.

Son esenciales para la comprensión, el tratamiento y el cuidado del verdadero enfoque de nuestro trabajo presente y futuro: las personas. De hecho, muy a menudo los mejores clínicos, que han pasado a la historia como genios, también fueron pintores, escultores, escritores, científicos y humanistas.

Uno de los más grandes médicos españoles de todos los tiempos, José de Letamendi (1828-1897), que fue profesor de anatomía y patología general, y también antropólogo, filósofo, pedagogo, pintor y violinista, decía: "El médico que sólo de Medicina sabe, ni de Medicina sabe" <sup>101</sup>.

Las máquinas no muestran empatía, ni saben cómo llegar al alma hablando o con una mirada, sentir, pensar sobre cosas que preocupan a nuestros pacientes, como sí pueden hacer los médicos humanistas, más allá de la evidencia científica. La medicina puede considerarse el arte que cura la enfermedad del paciente y el alma del paciente y del propio médico. Debemos profundizar en el conjunto de cualidades que caracterizan al buen estudiante de medicina, futuro médico y persona humana. Incuestionablemente, hay requisitos técnicos fundamentales que todo médico debe internalizar, durante su etapa de educación generalista o después como formación continuada. Pero la visión humanista, desde la música, poesía, filosofía, dialéctica, lecturas biográficas, e incluso el voluntariado, son el pretexto perfecto para cambiar actitudes y tomar conciencia del sentido último de las cosas, para trabajar en las llamadas habilidades "blandas" y para aprender herramientas valiosas para empoderarnos.

Como botón de muestra, la Ópera es Arte con mayúsculas. *Gesamtkunstwerk* (traducible del alemán como obra de arte total) que es un concepto atribuido al compositor

Richard Wagner, quien lo acuñó para referirse a la ópera como un tipo de obra de arte que integraba las antiguas seis Bellas Artes: la música, la danza, la poesía, la pintura, la escultura y la arquitectura <sup>102</sup>.

La iniciativa internacional "EL MÉDICO COMO HUMANISTA", que recientemente celebró su II Simposio Internacional del 1 al 3 de abril de 2019 en la Universidad Sechenov en Moscú, Rusia, tiene como misión mejorar la enseñanza y la práctica de la Medicina promoviendo las Humanidades en las profesiones sanitarias. Y pretende reincorporar los valores humanistas en las profesiones médicas, facilitando el diálogo entre las Humanidades y las Ciencias Biomédicas El III

Simposio ya se está planificando, a celebrarse del 25 al 28 de marzo de 2020 en Ciudad de México DF, México, organizado por la Universidad Anáhuac. Proponemos recuperar y facilitar en la educación médica general temas de Filosofía, Artes y otras disciplinas más allá de los libros de texto médicos y quirúrgicos. Debería ayudar a sobrevivir y superar el SQT, y ayudarnos a vivir una vida plena, como médicos y como personas. La implicación de la administración es clave en la prevención, pero también en la recuperación de los médicos afectados.

### **Conclusión:**

**Es indudable la necesidad de reintroducir las Humanidades en el curriculum académico de la carrera de medicina, y sugerimos que su mejor conocimiento podría ser una herramienta preventiva y terapéutica frente al SQT (“burnout”).**

### **PREGUNTA 20.- ¿Qué aspectos éticos concita todo esto?**

#### **Exposición:**

Cuando los términos designan problemas complejos y de perfiles no bien definidos, siempre conviene echar la vista atrás y reconstruir su historia, porque ella nos permitirá entender muchos aspectos que de otro modo nos pasarán desapercibidos. La expresión “estar quemado” tiene un sentido literal, el de las consecuencias sufridas por la exposición al fuego, y otro metafórico, el resultado de la acción nociva de fuegos distintos del físico, pero no por ello menos reales. La expresión “líder quemado” fue frecuente en los movimientos sociales, y sobre todo en el interior de los grupos revolucionarios, desde mediados del siglo XIX. Los dirigentes se consideraban quemados cuando ya no podían resistir la presión inherente a su cargo y tenían que ser sustituidos. Esto era frecuente en las organizaciones políticas y sindicales.

Como sucede con otras expresiones, esta ha venido a menos en esos contextos clásicos y ha cobrado nueva vigencia en el interior de las organizaciones profesionales. Hasta tal punto es esto así, que cuando en 1974 Freudenberger acuñó la expresión *burn-out syndrom*, síndrome del quemado, lo hizo a partir de su experiencia con profesionales, en especial sanitarios<sup>6</sup>. Cuando hoy alguien utiliza el término “quemado” en sentido metafórico, todo el mundo entiende que se está refiriendo a un profesional, y probablemente a un médico. Este cambio de atribución no deja de ser sorprendente. Y nos pone sobre la pista de un hecho histórico de la máxima importancia, cual es el del incremento de la presión social sobre los profesionales, especialmente sobre las en otro tiempo denominadas “profesiones liberales”. Sus miembros han de tomar continuamente decisiones de enorme responsabilidad, pero a la vez se ven obligados a hacerlo de modo cada vez más rápido y en un mayor número de casos. La gestión empresarial del ejercicio de estas profesiones ha llevado a un incremento muy considerable de la eficiencia, pero también al aumento exponencial de la presión sobre sus miembros, todo unido a un crecimiento de la conflictividad, que la profesional vivencia como una falta de reconocimiento social y, por si esto fuera poco, con una remuneración económica cicatera, cuando no claramente injusta.

El desgaste profesional se ha convertido, a partir de Freudenberg, en un “síndrome”, es decir, en un conjunto de síntomas que aparecen juntos: nerviosismo, fatiga, pérdida de ilusión por el trabajo, dificultad de concentración, aumento del número de errores, etc. Como existen pruebas objetivas que sirven para diagnosticar este síndrome, no hay más que repasar los ítems que las componen para tener una idea de cuáles son sus síntomas principales. Pero el diagnóstico sindrómico, hasta ahora casi el único estudiado, dice poco o nada sobre sus causas. Para ello es preciso llevar a cabo un “diagnóstico etiológico”, algo bastante más difícil y complejo, ya que exige analizar las “causas” que desencadenan el complejo sintomático que caracteriza al síndrome. Como en toda enfermedad, cabe distinguir dos tipos de factores, los “predisponentes” y los “desencadenantes”. Ya decía Galeno que los procesos patológicos se debían a la convergencia de dos tipos de causas, que él denominó “procatárticas”, internas o predisponentes, y “proegúmenas”, externas o desencadenantes. Ambas son necesarias, de tal modo que las primeras sin las segundas no dan como resultado una enfermedad, de igual modo que tampoco estas últimas sin las otras. No hay duda de que al síndrome de desgaste profesional predisponen ciertos factores biológicos y psicológicos, como la enfermedad física, la enfermedad mental, la falta de madurez, la poca fortaleza antes las adversidades (lo que hoy se denomina, más en inglés que en español, débil resiliencia), etc. Es claro que todos estos factores han estado presentes en los profesionales desde siempre, lo que viene a indicar que ellos pueden ser causa “necesaria”, pero no “suficiente” para el desarrollo del síndrome. No toda persona con poca fortaleza física o mental desarrolla un síndrome de desgaste profesional, etc. Esto nos obliga fijar la atención sobre los otros factores, los “desencadenantes”. Estos, a diferencia de los anteriores, han de caracterizarse por ser “nuevos”, de modo que deben estar en relación con los cambios acaecidos en las profesiones liberales, y muy concretamente en la medicina, durante el último medio siglo. Entre ellos se encuentran, cuando menos, los siguientes:

- *Los cambios en las relaciones profesionales, que han pasado de ser verticales a horizontales.* De nuevo la medicina es un ejemplo típico de esto. El modelo clásico de relación vertical era el llamado “paternalismo”, en el que el profesional interactuaba, en el caso del médico, con el paciente, siguiendo el modelo de la relación padre-hijo, de tal modo que buscaba lo mejor para el paciente, pero sin el paciente, es decir, sin incluirle en el proceso de toma de decisiones.
- *El nuevo perfil de los usuarios, que de amigos morales han pasado a ser extraños morales.* El resultado de este cambio es la desconfianza mutua, que lleva al profesional a protegerse ante las posibles demandas. En el caso de los pacientes, la expresión de esto han sido sus “códigos de derechos”. El profesional ha visto esto como la juridificación y burocratización de las relaciones profesionales, ante las que ha buscado defenderse a través de la llamada “medicina defensiva”.
- *La tiranía de la “cultura de la eficiencia”, que ha hecho cada vez menos gratificante el ejercicio de la profesión.* La eficiencia es el principio básico de la ciencia económica. De la mano de los economistas pasó a imponerse en el trabajo industrial durante la primera mitad del siglo XX, y en la segunda ha ido introduciéndose también en las instituciones profesionales. Un ejemplo

paradigmático de esto lo constituye el hospital, que de estar dirigido por médicos ha pasado a serlo por gestores profesionales, en un intento por incrementar su eficiencia. Este cambio se ha visto reforzado por la crisis económica de los años 2008-2014, hasta el punto de que los profesionales han comenzado a sentirse incómodos, considerando, en un número creciente de casos, que se les estaba obligando a ejercer la profesión en condiciones incompatibles con la calidad, el decoro y la ética profesional. Un ejemplo de esto lo ha constituido el debate norteamericano sobre el llamado *managed-care*.

□ *La revolución operada en la propia medicina científica, que ha puesto en cuestión las bases tenidas por inamovibles durante toda su historia.* Este es el caso de la que hoy se conoce con los nombres de “medicina personalizada”, “medicina genómica” o “medicina de precisión”, que obliga a revisar categorías hasta hace nada tenidas por intocables, como la de “especificidad” de los procesos clínicos, de tal modo que la función del profesional consistía en identificar la “especie morbosas” sufrida por el paciente, a partir de ella dar con la “etiología específica” del proceso y buscar el “tratamiento específico”. Esta era la cadena de la especificidad, que en las últimas décadas ha perdido gran parte de su antigua importancia. La genética nos ha convencido de que no hay un cáncer de mama, sino muchos, y que lo mismo sucede con las demás entidades morbosas, la diabetes, la esquizofrenia, o cualquier otra. Cada día cobra mayor vigencia el apotegma clásico de que “no hay enfermedades sino enfermos”. La convergencia de estos cuatro factores ha cambiado el ejercicio de la medicina de tal modo, que a muchos profesionales les cuesta identificarse con el nuevo rol. Esto no es lo que les enseñaron en la Facultad, ni lo que les llevó a estudiar esta carrera o a elegir esta profesión. La consecuencia es la frustración, el desánimo, y muchas veces el sentimiento de culpa. Saben que no saben y que no pueden hacer las cosas bien, como ellos quisieran. Es lo que desde Sócrates se denomina “el saber del no saber”, que si no lleva al abandono del ejercicio profesional, exige la búsqueda de soluciones.

Son varias las soluciones que se han propuesto. Una, que los profesionales puedan estudiar con calma a sus pacientes. Tal es, por ejemplo, lo que pretende la llamada “plataforma 10 minutos”. Los movimientos sindicales, por su parte, han buscado el remedio en la mejora de las condiciones laborales y sobre todo económicas de los profesionales, siempre escasas, pero muy venidas a menos durante los años de la crisis.

Nuestra opinión es que todas esas medidas, con ser útiles y muy puestas en razón, no acabarán con el síndrome de desgaste profesional. Porque el mayor desgaste no lo genera la prisa, ni tampoco los bajos ingresos, sino la sensación que tiene el profesional de que no está haciendo las cosas como deberían hacerse. Intuye que debe hacerlas de modo distinto a aquél que le enseñaron durante los años de Facultad y de residencia, pero no sabe cómo.

Le entrenaron para tomar decisiones a la vista de los hechos clínicos, pero no le formaron sobre el otro elemento que hoy es necesario introducir en todo proceso correcto de toma de decisiones: la gestión correcta de los valores del paciente. Una anemia grave no puede tratarse de igual modo en un Testigo de Jenová que en una persona que no lo es. Los valores son muchos, económicos, sociales,



culturales, religiosos, etc., y todos hay que tenerlos en cuenta en la relación clínica. Los valores hay que explorarlos, como se exploran los hechos clínicos. Lo cual exige formación y entrenamiento adecuados, de igual modo que se necesitó en el caso de los hechos clínicos. Las condiciones del ejercicio médico han cambiado a una velocidad muy superior a la de los programas de formación. Hace ahora 15 años, en 2004, llamamos la atención sobre este problema<sup>103</sup> que desde entonces no ha hecho más que incrementarse y ganar en importancia. La urgencia en el remedio ha llevado a que los programas existentes de formación en bioética se hayan organizado precipitadamente, y con docentes ellos mismos necesitados de formación. El problema primario y más grave es quién enseña al enseñador. Porque, hoy como antaño, sigue siendo cierto que “si un ciego conduce a otro ciego, ambos caerán en el hoyo” (Mt 15,14).

### **Conclusión:**

**En este último medio siglo el ejercicio de las llamadas profesiones liberales, y muy en particular el ejercicio de la medicina ha sufrido un cambio drástico. Hay, al menos, cuatro factores en ello: el paso de unas relaciones interhumanas de tipo vertical y paternalista a otro horizontal, presidido por las cartas de derechos de los enfermos; la conversión de los pacientes de amigos morales en extraños morales, y el consiguiente auge de la medicina defensiva; la aparición de la cultura de la eficiencia en las instituciones sanitarias, que ha obligado al profesional a tener en cuenta el factor económico, a veces incluso en detrimento de otros factores que él considera moralmente vinculantes; y, en fin, la revolución que están suponiendo los avances científicos, y más en concreto el auge de la llamada medicina personalizada o medicina de precisión.**

**Los conflictos que generan todas estas novedades son muchos y de diverso tipo, pero de todos ellos hay uno sobre el que pocas veces se llama la atención. Se trata de que la exploración y diagnóstico de un paciente exige hoy tener en cuenta no sólo los datos clínicos, sino también sus valores, algo para lo que los profesionales no han sido suficientemente entrenados. Muchas veces no saben cómo proceder bien, pero sí saben que no lo están haciendo correctamente. Este es el que cabe denominar “burnout moral”, para el cual no hay otro tratamiento correcto que la adecuada formación en valores. Algo que se hace poco y, además, con programas de muy escasa calidad.\_\_\_\_**

### **Financiación**

Esta publicación fue financiada por GSK. Los autores no han recibido ningún honorario por su colaboración.

### **Conflicto de intereses**

Los autores declaran que no tienen ningún conflicto de intereses

## REFERENCIAS

1. Gil-Monte PR. El Síndrome de Quemarse por el trabajo (Burnout). Quinta Edición ed. Madrid: Ediciones Pirámide; 2017.
2. Gil-Monte PR. Influence of guilt on the relationship between burnout and depression. *European Psychologist*. 2012;17:231-6.
3. Maslach C, Leiter MP. Understanding the burnout experience: recent research and its implications for psychiatry. *World psychiatry: official journal of the World Psychiatric Association (WPA)*. 2016;15(2):103-11.
4. Maslach C, Leiter MP. New insights into burnout and health care: Strategies for improving civility and alleviating burnout. *Medical teacher*. 2017;39(2):160-3.
5. Gil-Monte P, Viotti S, D. C. Propiedades psicométricas del «Cuestionario para el Evaluación del Síndrome de Quemarse por el Trabajo» (CESQT) en profesionales de la salud italianos: una perspectiva de género. *Liberabit*. 2017;23: 153-69.
6. Freudenberger H J. Staff burnout. *Journal of Social Issues* 1974;30:159–65.
7. Edelwich J, A. B. Burnout: Stages of Disillusionment in the Helping Professions. Nueva York: Human Sciences Pres; 1980.
8. Pines A, D. K. Tedium in the life and work of professional women as compared with men. *Sex Roles*. 1981;7:963-77.
9. Bianchi R, Schonfeld IS, Laurent E. Burnout-depression overlap: a review. *Clinical Psychology Review*. 2015;36:28-41.
10. Maslach C, E. JS. Maslach Burnout Inventory. Manual. Palo Alto, CA: Consulting Psychologists Press.; 1981.
11. Maslach C, SE. J, P. LM. Maslach Burnout Inventory Manual. Ed r, editor. Palo Alto, CA: Consulting Psychologists Press.; 1996.
12. Shanafelt TD, Balch CM, Bechamps GJ, Russell T, Dyrbye L, Satele D, et al. Burnout and career satisfaction among American surgeons. *Annals of surgery*. 2009;250(3):463-71.
13. Qureshi HA, Rawlani R, Mioton LM, Dumanian GA, Kim JY, Rawlani V. Burnout phenomenon in U.S. plastic surgeons: risk factors and impact on quality of life. *Plastic and reconstructive surgery*. 2015;135(2):619-26.
14. Shanafelt TD, Hasan O, Dyrbye LN, Sinsky C, Satele D, Sloan J, et al. Changes in Burnout and Satisfaction With Work-Life Balance in Physicians and the General US Working Population Between 2011 and 2014. *Mayo Clinic proceedings*. 2015;90(12):1600-13.
15. Kamal AH, Bull JH, Wolf SP, Swetz KM, Shanafelt TD, Ast K, et al. Prevalence and Predictors of Burnout Among Hospice and Palliative Care Clinicians in the U.S. *Journal of pain and symptom management*. 2016;51(4):690-6.
16. Li H, Zuo M, Gelb AW, Zhang B, Zhao X, Yao D, et al. Chinese Anesthesiologists Have High Burnout and Low Job Satisfaction: A Cross-Sectional Survey. *Anesthesia and analgesia*. 2018;126(3):1004-12.
17. Banerjee S, Califano R, Corral J, de Azambuja E, De Mattos-Arruda L, Guarneri V, et al. Professional burnout in European young oncologists: results of the European Society for Medical Oncology (ESMO) Young Oncologists Committee Burnout Survey. *Annals of oncology: official journal of the European Society for Medical Oncology*. 2017;28(7):1590-6.
- 17bis. Mingote Adan JC, Moreno Jimenez B, Galvez Herrer M. Desgaste profesional y salud de los profesionales médicos: revisión y propuestas de prevención. *Med. Clin (Barc)*. 2044; 123 (7): 265-270.
18. Grau Martin A, Flichtentrei D, Suner R, Prats M, Braga F. Influencia de factores personales, profesionales y transnacionales en el síndrome de burnout en personal

- sanitario hispanoamericano y Español (2007). *Revista española de salud pública*. 2009;83(2):215-30.
19. Grau A, Suner R, Garcia MM. Desgaste profesional en el personal sanitario y su relacion con los factores personales y ambientales. *Gaceta sanitaria*. 2005;19(6):463-70.
20. Riquelme I, Chacon JI, Gandara AV, Muro I, Traseira S, Monsalve V, et al. Prevalence of Burnout Among Pain Medicine Physicians and Its Potential Effect upon Clinical Outcomes in Patients with Oncologic Pain or Chronic Pain of Nononcologic Origin. *Pain medicine (Malden, Mass)*. 2018.
21. Rotenstein LS, Torre M, Ramos MA, Rosales RC, Guille C, Sen S, et al. Prevalence of Burnout
22. Moreno-Jiménez B, González JL, E. G. Desgaste profesional (burnout), Personalidad y Salud percibida. Dpto. Ps. Biológica y de la Salud UAM. In: (Eds) JByFR,
23. Jefatura del Estado. LEY 31/1995, de 8 de noviembre, de Prevención de Riesgos Laborales. *Boletín Oficial del Estado*. 1995;269(10-11).
24. Gil-Monte PR. El síndrome de quemarse por el trabajo (burnout). Grupos profesionales de riesgo. (burnout). EG-MPyMJBESdqpet, editor. Madrid: Pirámide; 2007.
- 24bis. Melnick ER, Dyrbye LN, Sinsky CA, Trockel M, West CP, Nedelec L, et al. The association between perceived electronic health record usability and professional burnout among US physicians. *Mayo.Clin.Proc*. 2019; doi 10.1016/j.mayocp.2019.09.024. Epub ahead of print].
25. Cherniss C. The role of professional self-efficacy in the etiology of burnout. In: W.B. Schaufeli CMyTME, editor. *Professional burnout recent developments in theory and research* London: Taylor and Francis; 1993. p. 135-49.
26. Ruzycki SM, Lemaire JB. Physician burnout. *CMAJ: Canadian Medical Association journal = journal de l'Association medicale canadienne*. 2018;190(2):E53.
27. Bridgeman PJ, Bridgeman MB, Barone J. Burnout syndrome among healthcare professionals. *American journal of health-system pharmacy: AJHP : official journal of the American Society of Health-System Pharmacists*. 2018;75(3):147-52.
28. Aronsson G, Theorell T, Grape T, Hammarstrom A, Hogstedt C, Marteinsdottir I, et al. A systematic review including meta-analysis of work environment and burnout symptoms. *BMC public health*. 2017;17(1):264.
29. Bauernhofer K, Bassa D, Canazei M, Jimenez P, Paechter M, Papousek I, et al. Subtypes in clinical burnout patients enrolled in an employee rehabilitation program: differences in burnout profiles, depression, and recovery/resources-stress balance. *BMC psychiatry*. 2018;18(1):10.
30. Kaschka WP, Korczak D, Broich K. Burnout: a fashionable diagnosis. *Deutsches Arzteblatt international*. 2011;108(46):781-7.
31. van Mol MM, Kompanje EJ, Benoit DD, Bakker J, Nijkamp MD. The Prevalence of Compassion Fatigue and Burnout among Healthcare Professionals in Intensive Care Units: A Systematic Review. *PLoS one*. 2015;10(8):e0136955.
32. Panagioti M, Panagopoulou E, Bower P, Lewith G, Kontopantelis E, Chew-Graham C, et al. Controlled Interventions to Reduce Burnout in Physicians: A Systematic Review and Meta-analysis. *JAMA internal medicine*. 2017;177(2):195-205.
33. Gil-Monte PR. Factorial validity of the Maslach Burnout Inventory (MBI-HSS) among Spanish professionals. *Revista de saude publica*. 2005;39(1):1-8.

34. Price DM, Murphy PA. Staff burnout in the perspective of grief theory. *Death education*. 1984;8(1):47-58.
35. Maslach C. *Burnout: The cost of caring*. New York: Prentice Hall Press.; 1982.
36. Golembiewski RT, Munzenrider R F, D. C. Phases of progressive burnout and their work site covariants: Critical issues in OD research and proxis. *Journal of Applied Behavioral Science*. 1983;19:461-81.4
- 37 Paine W S. The burnout syndrome in context. En J. W. Jones (Ed.) p, editor. Park Ridge, Illinois: London House Press.; 1982.
38. Vanheule S, Lievrouw A, P. V. Burnout and intersubjectivity: A psychoanalytical study from a Lacanian perspective. *Human Relations*. 2003;56: 321-32.
39. Oosterholt B G, Maes J H, Van der Linden D, Verbraak M J, A. KM. Cognitive performance in both clinical and non-clinical burnout. *Stress (Amsterdam, Netherlands)*. 2014;17: 400-9.
40. van Dam A. Subgroup analysis in burnout: Relations between fatigue, anxiety, and depression. *Frontiers in Psychology*. 2016:7-90.
41. Tops M, Boksem M A, Wijers A A, van Duinen H, Den Boer J A, Meijman T F aK, J. The psychobiology of burnout: Are there two different syndromes? *Neuropsychobiology*. 2007;55: 143–50.
42. Gil-Monte. P R. *El síndrome de quemarse por el trabajo (burnout). Una enfermedad laboral en la sociedad del bienestar*. Madrid: Pirámide; 2005.
43. Maslach. C, Jackson. S E. *MBI: Maslach Burnout Inventory; Manual Research Edition*. Palo Alto, CA. University of California, Consulting Psychologists Press; 1986.
44. Bourbonnais R, Comeau M, Vezina M. Job strain and evolution of mental health among nurses. *Journal of occupational health psychology*. 1999;4(2):95-107.
45. Shirom A. Job related burnout: a review. (eds) QJTL, editor. Washington, DC: American Psychological Association; 2003. 245– 64.
46. Hatfield. E, Cacioppo. JT, L. RR. *Emotional Contagion*. New York. Cambridge University Press, 1994.
47. McIntosh. DN, Druckman. D, B. ZR. Socially induced affect. In: Druckman D. (Bjork R.A. (eds), editor. *In Learning, Remembering, Believing: Enhancing Human Performance*. Washington, DC: National Academy Press; 1994. p. 251–76.
48. Howes MJ, Hokanson JE, Loewenstein DA. Induction of depressive affect after prolonged exposure to a mildly depressed individual. *Journal of personality and social psychology*. 1985;49(4):1110-3.
49. Bakker AB, Le Blanc PM, Schaufeli WB. Burnout contagion among intensive care nurses. *Journal of advanced nursing*. 2005;51(3):276-87.
50. Karasek. R A. Job demands, job decision latitude, and mental strain: implications for job design. *Administrative science quarterly*. 1979; 24:285–308.
51. Karasek. R A. *Job Content Questionnaire*. University of Southern California, Los Angeles, CA 1995.
52. Van Veldhoven. M, De Jonge. J, Broersen. S, Kompier. M, Meijman. T. Specific relationships between psychosocial job conditions and job related stress: a three-level analytic approach. *Work and stress*. 2002;16: 207–28.
53. Groenestijn. E, Buunk. B P, Schaufeli WB. Het besmet- tingsgevaar bij burnout: De rol van sociale vergelijkingsprocessen In: Meertens R.W. BAP, van Lange P.A.M. (Verplanken B. (eds),, editor. *In Sociale psychologie (beinvloeding van inter-menselijke en gezondheidsproblemen* The Hague, The Netherlands: VUGA. 1992. p. 88–103.
54. Gálvez. M, Moreno. B, Mingote. J. *El desgaste profesional del médico. Revisión y Guía de Buenas Prácticas ...* Madrid: Díaz de Santos 2009.

55. Maslach. C, Leiter. M. The Truth about Burnout. How organizations cause personal stress and what to do about it. San Francisco: Jossey-Bass Publishers; 1997.
56. Shirom. A, Nirel. N, Vinokur. A. Work hours and caseload as predictors of physician burnout: The mediating affects by perceived workload and by autonomy. *Applied Psychology: An International Review* 2010;59:539-65.
57. Ministerio de Empleo y Seguridad Social. Real Decreto Legislativo 8/2015, de 30 de octubre, por el que se aprueba el texto refundido de la Ley General de la Seguridad Social. 2016. BOE-A-2015-11724.
58. Ministerio de Trabajo y Asuntos Sociales. Real Decreto 1299/2006, de 10 de noviembre, por el que se aprueba el cuadro de enfermedades profesionales en el sistema de la Seguridad Social y se establecen criterios para su notificación y registro. BOE. 2006;302, de 19 de diciembre de 2006 Referencia: BOE-A-2006-22169.
59. Organización Internacional del Trabajo. Enfermedades profesionales de la OIT. In: [https://www.ilo.org/wcmsp5/groups/public/@ed\\_protect/@protrav/@safework/documents/publication/wcms\\_12\\_5164.pdf](https://www.ilo.org/wcmsp5/groups/public/@ed_protect/@protrav/@safework/documents/publication/wcms_12_5164.pdf), editor. 2010.
60. Wiederhold BK, Cipresso P, Pizzioli D, Wiederhold M, Riva G. Intervention for Physician Burnout: A Systematic Review. *Open medicine (Warsaw, Poland)*. 2018;13:253-63.
61. Gálvez. M, Moreno. B, Mingote. JC. El desgaste profesional del médico. Revisión y guía de buenas prácticas. El vuelo de Icaro. Madrid: Diaz de Santos; 2009.
62. Lasalvia A, Tansella M. Occupational stress and job burnout in mental health. *Epidemiology and psychiatric sciences*. 2011;20(4):279-85.
63. Lasalvia A, Bonetto C, Bertani M, Bissoli S, Cristofalo D, Marrella G, et al. Influence of perceived organisational factors on job burnout: survey of community mental health staff. *The British journal of psychiatry: the journal of mental science*. 2009;195(6):537-44.
64. Shanafelt TD, Mungo M, Schmitgen J, Storz KA, Reeves D, Hayes SN, et al. Longitudinal Study Evaluating the Association Between Physician Burnout and Changes in Professional Work Effort. *Mayo Clinic proceedings*. 2016;91(4):422-31.
65. Weight CJ, Sellon JL, Lessard-Anderson CR, Shanafelt TD, Olsen KD, Laskowski ER. Physical activity, quality of life, and burnout among physician trainees: the effect of a team-based, incentivized exercise program. *Mayo Clinic proceedings*. 2013;88(12):1435-42.
66. Shanafelt TD, Gorringer G, Menaker R, Storz KA, Reeves D, Buskirk SJ, et al. Impact of organizational leadership on physician burnout and satisfaction. *Mayo Clinic proceedings*. 2015;90(4):432-40.
67. Le Blanc PM, Hox JJ, Schaufeli WB, Taris TW, Peeters MC. Take care! The evaluation of a teambased burnout intervention program for oncology care providers. *The Journal of applied psychology*. 2007;92(1):213-27.
68. Steven. G, editor Burnout in chairs of obstetrics and gynecology: Diagnosis, treatment, and prevention: Presidential address. Annual Meeting of the American Gynecological and Obstetrical Society; 2002; Hot Springs: September 12-14.
69. Butow P, Cockburn J, Girgis A, Bowman D, Schofield P, D'Este C, et al. Increasing oncologists' skills in eliciting and responding to emotional cues: evaluation of a communication skills training program. *Psychooncology*. 2008;17(3):209-18.
70. Lopez-Castillo J, Gurpegui M, Ayuso-Mateos JL, Luna JD, Catalan J. Emotional distress and occupational burnout in health care professionals serving HIV-infected patients: A comparison with oncology and internal medicine services. *Psychotherapy and psychosomatics*. 1999;68(6):348-56.
71. Fridner A, Belkic K, Marini M, Gustafsson Senden M, Schenck-Gustafsson K. Why don't academic physicians seek needed professional help for psychological distress? *Swiss medical weekly*. 2012;142:w13626.

72. Shanafelt TD, Balch CM, Dyrbye L, Bechamps G, Russell T, Satele D, et al. Special report: suicidal ideation among American surgeons. *Archives of surgery (Chicago, Ill: 1960)*. 2011;146(1):54-62.
73. Dewa CS, Loong D, Bonato S, Thanh NX, Jacobs P. How does burnout affect physician productivity? A systematic literature review. *BMC health services research*. 2014;14:325.
74. Cano-Langreo. M, Cicirello-Salas. S, López-López. A, Aguilar-Vela. M. Marco actual del suicidio e ideas suicidas en personal sanitario. *Med segur trab* 2014;60(234):198-218.
75. Mingote Adán. JC, Crespo Hervás. D, Hernández Álvarez. M, Navío. M, C. RG-P. Prevención del suicidio en médicos. *Med Segur Trab*. 2013;59:176-204.
- 76.- Ruitenburg M M. Frings-Dresen M H, Sluiter J K. The prevalence of common mental disorders among hospital physicians and their association with self-reported work ability: a cross-sectional study. *BMC Health Serv Res*. 2012; 12: 292-298.
- 77.- Soler J K, Yaman H, Esteva M, Dobbs F, Asenova R S, Katic M. et al. Burnout in European family doctors: the EGPRN study. *Fam. Pract*. 2008; 25 (4): 245-265.
78. Siu C, Yuen SK, Cheung A. Burnout among public doctors in Hong Kong: cross-sectional survey. *Hong Kong medical journal = Xianggang yi xue za zhi*. 2012;18(3):186-92.
79. Hoff T, Whitcomb WF, Nelson JR. Thriving and surviving in a new medical career: the case of hospitalist physicians. *Journal of health and social behavior*. 2002;43(1):72-91.
80. Zhang Y, Feng X. The relationship between job satisfaction, burnout, and turnover intention among physicians from urban state-owned medical institutions in Hubei, China: a cross-sectional study. *BMC health services research*. 2011;11:235.
81. Dewa CS, Jacobs P, Thanh NX, Loong D. An estimate of the cost of burnout on early retirement and reduction in clinical hours of practicing physicians in Canada. *BMC health services research*. 2014;14:254.
82. Hamidi MS, Bohman B, Sandborg C, Smith-Coggins R, de Vries P, Albert MS, et al. Estimating institutional physician turnover attributable to self-reported burnout and associated financial burden: a case study. *BMC health services research*. 2018;18(1):851.
83. Lopez-Jímenez J M. La consideración por la OMS del burnout como enfermedad profesional es un hito. <https://confilegalcom/20190602-la-consideracion-por-la-oms-del-burnout-como-enfermedad-profesionales-un-hito/>. 2019.
84. Gobierno de España. Real Decreto Legislativo 8/2015, de 30 de octubre, por el que se aprueba el texto refundido de la Ley General de la Seguridad Social. . BOE. 2015.
85. Sempere-Navarro E. El estrés laboral como accidente de trabajo. Social RdA, editor. Cizur Menor. : Editorial Aranzadi, S.A.U., ; 1999.
86. Sánchez Pérez. J. El síndrome del trabajador quemado (burn out) su contenido y su polémico encuadramiento jurídico-laboral. *Revista de información laboral*, ISSN 0214-6045, . 2016;5:8-14, 31-50.
87. Jefatura del Estado. Ley 31/1995 de 8 de Noviembre, de Prevención de Riesgos Laborales. . 1995. Boletín Oficial del Estado.
- 87.bis Jefatura del Estado. LEY 54/2003, de 12 de diciembre, de reforma del marco normativo de la prevención de riesgos laborales. . Boletín Oficial del Estado. 2003; Nº 298, 13/12/2003.

: <https://www.boe.es/buscar/doc.php?id=BOE-A-2003-228611>.

88. López M. Informe de calidad de vida y desgaste profesional del médico: España. . Medscape [Internet] 1 2012: <https://espanol.medscape.com/diapositivas/59000099.mon>
89. Oliva. J, Peña. LM, González. B, Urbanos. R, Barber. P, Zozaya. Crisis económica y salud en España. Madrid: MSCBS; . 2018; <https://bit.ly/2YVydEJ>.
90. Ministerio de Sanidad. Informe Anual del Sistema Nacional de Salud 2017. . Informes temáticos basados en el documento sobre el Sistema Nacional de Salud 2018;<https://bit.ly/2W5PM73>.
91. Castellanos Asenjo. A. Tesis doctoral sobre Modelo de gestión de prevención en un servicio de Medicina Intensiva. Identificación y valoración de las causas de los niveles de estrés oxidativo. Universidad de Valladolid. 2008.
92. Mingote Adán. JC, Moreno Jiménez. B, Rodríguez Carvajal. R, Gálvez Herrer. M, Ruíz López. P. Validación psicométrica de la versión española del Cuestionario de Relaciones Médico-Paciente (CREM-P). Actas Españolas de Psiquiatría 2009; 37 94-100.
93. Moreno-Jiménez. B, Rodríguez-Carvajal. R, Gálvez. M, Garrosa. E. Aspectos psicosociales de la práctica clínica. . Atención Primaria y Salud Mental. 2005;8:12-20.
94. Van der Feltz-Cornelis CM, Van Oppen P, Van Marwijk HW, De Beurs E, Van Dyck R. A patientdoctor relationship questionnaire (PDRQ-9) in primary care: development and psychometric evaluation. General hospital psychiatry. 2004;26(2):115-20.
95. West CP, Dyrbye LN, Erwin PJ, Shanafelt TD. Interventions to prevent and reduce physician burnout: a systematic review and meta-analysis. Lancet (London, England). 2016;388(10057):2272-81.
96. Boudreau JD, Fuks A. The Humanities in Medical Education: Ways of Knowing, Doing and Being. J Med Humanit. 2015; 36:321-36.
97. Young RK. Introducing The Arts and Medicine: JAMA Turns Another Page. JAMA. 2016;316:1365.
98. Epstein M. For a truly humanistic ethic, we need truly humanistic medicine. Br Med J 2014;348:g1133.
99. Glick. SM. Sounding board. Humanistic medicine in a modern age. The New England journal of medicine. 1981;304:1036-8.
100. Orefice. C, Baños. JE, Eds. The role of humanities in the teaching of medical students. Barcelona (Spain): Fundació Dr Antoni Esteve; 2018.
101. Pulido y Fernández .Ángel. Biografía del Dr. D. José de Letamendi y Manjarrés. Anales de la Real Academia de Medicina 1898;2-3: 97-136.
102. Soriano. JB. On Doctors and Their Operas: A Critical (and Lyrical) Analysis of Medicine in Opera. Chest. 2018;154:409-15.
103. Gracia. D. Medice, cura te ipsum: Sobre la salud física y mental de los profesionales sanitarios. Real Academia Nacional de Medicina. 2004(Madrid).
